1 Subventricular zone cytogenesis provides trophic support for neural repair

2

3 Michael R. Williamson<sup>1\*</sup>, Stephanie P. Le<sup>2</sup>, Ronald L. Franzen<sup>2</sup>, Nicole A. Donlan<sup>2</sup>, Jill L.

4 Rosow<sup>2</sup>, Andrew K. Dunn<sup>1,3</sup>, Theresa A. Jones<sup>1,2</sup>, Michael R. Drew<sup>1,4</sup>

5

6 <sup>1</sup>Institute for Neuroscience

7 <sup>2</sup>Department of Psychology

8 <sup>3</sup>Department of Biomedical Engineering

9 <sup>4</sup>Center for Learning and Memory and Department of Neuroscience

10 University of Texas at Austin, Austin, Texas, USA, 78712

11

12 \*Correspondence:

13 Michael R. Williamson

14 1 University Station, C7000, Austin, TX, 78712

15 mrwillia@utexas.edu

16 **Abstract**

17 Stroke enhances proliferation of neural precursor cells within the subventricular zone (SVZ) and  
18 induces ectopic migration of newborn cells towards the site of injury. Here we characterize the  
19 identity of cells arising from the SVZ after stroke and provide insight into their function by  
20 uncovering a mechanism through which they facilitate neural repair and functional recovery.  
21 Using genetic lineage tracing, we show that SVZ-derived cells that migrate towards stroke-  
22 induced cortical lesions in mice are predominantly undifferentiated precursors, suggesting that  
23 the main function of post-injury cytogenesis is not cell replacement. We find that SVZ-derived  
24 cells are a unique cellular source of trophic factors that instruct neural repair. Chemogenetic  
25 ablation of neural precursor cells or conditional knockout of VEGF in the adult neural stem cell  
26 lineage impairs neuronal and vascular reparative responses and worsens functional recovery after  
27 stroke. In addition, normal aging markedly diminishes the cytogenic response to stroke, resulting  
28 in worse functional recovery. Therapeutic replacement of VEGF in peri-infarct cortex is  
29 sufficient to induce neural repair and functional recovery in mice with arrested cytogenesis.  
30 These findings indicate that the SVZ cytogenic response following brain injury is a source of  
31 trophic support that drives neural repair and recovery.

32

33

34

35

## 36 **Introduction**

37           Limited recovery of function occurs after damage to the central nervous system.  
38   Consequently, stroke and other forms of brain injury often cause long-lasting disabilities.  
39   Following stroke, remodeling of residual tissue surrounding the site of injury is thought to  
40   underlie recovery. For example, extensive plasticity of neural circuits and blood vessels occurs in  
41   peri-infarct regions and these processes are associated with functional improvement (Brown et  
42   al., 2007; Clark et al., 2019; Tennant et al., 2017; Williamson et al., 2020). Repair processes are  
43   mediated by interactions across disparate cell types (Brown et al., 2007; Clark et al., 2019; Joy et  
44   al., 2019; Kim et al., 2018; Williamson et al., 2021). However, the intercellular interactions that  
45   orchestrate repair and recovery remain to be completely defined. A more complete understanding  
46   of the mechanisms that govern neural repair could inform development of new treatment  
47   strategies.

48           Cytogenesis, the formation of new cells, is limited in the adult mammalian brain. The  
49   subventricular zone (SVZ) is one of a small number of regions that contains multipotent neural  
50   stem and progenitor cells (collectively referred to here as precursors) that generate new neurons  
51   and glia in adulthood (Doetsch et al., 1999; Garcia et al., 2004). Normally, the predominant  
52   progeny arising from the SVZ are new neurons that migrate towards the olfactory bulb and  
53   integrate into existing olfactory circuitry. However, injuries such as stroke markedly increase  
54   SVZ precursor proliferation and induce ectopic migration of SVZ-derived cells towards the site  
55   of injury (Arvidsson et al., 2002; Lagace, 2012; Li et al., 2010; Ohab et al., 2006; Parent et al.,  
56   2002; Williamson et al., 2019). Past studies of this process after brain injury have largely focused  
57   on neurogenesis — the formation of new neurons and their localization in peri-infarct regions  
58   (Arvidsson et al., 2002; Parent et al., 2002). In general, experimental manipulations that increase

59 post-stroke neurogenesis are associated with enhanced functional recovery (Lagace, 2012). The  
60 prevailing view has been that cell replacement, especially neuron replacement, by SVZ  
61 precursors allows for partial brain regeneration and consequently improved function. However,  
62 recent findings indicate that new neurons poorly integrate into existing circuits in peri-infarct  
63 regions and receive little synaptic input (Kannangara et al., 2018), making their functional  
64 importance unclear (cf. Liang et al., 2019). Moreover, other studies have found that glia  
65 outnumber neurons among migrating SVZ-derived cells, but the entire population of SVZ-  
66 derived cells has yet to be comprehensively characterized (Benner et al., 2013; Faiz et al., 2015;  
67 Li et al., 2010). Overall, the identity and functional importance of new cells that arise from the  
68 SVZ after injury are not well understood.

69         Here we investigate the SVZ cytogenic response following cortical photothrombotic  
70 strokes in mice. Our goals were to characterize the types of cells produced by the SVZ after  
71 stroke and mechanistically understand the role of SVZ cytogenesis in stroke recovery. We use  
72 indelible lineage tracing to phenotype SVZ-derived cells that migrate towards the site of injury.  
73 Unexpectedly, we find that the majority of these cells are undifferentiated precursors, suggesting  
74 that cell replacement is limited. Reducing cytogenesis impairs motor recovery after stroke, at  
75 least in part due to deficits in neuronal and vascular plasticity. With gain- and loss-of-function  
76 manipulations, we show that VEGF produced by SVZ-derived cells drives repair and functional  
77 recovery. These findings identify SVZ cytogenesis as a source of trophic support that facilitates  
78 neural repair. Thus, our study demonstrates a mechanism other than cell replacement by which  
79 endogenous neural precursor cells contribute to repair and recovery in the injured central nervous  
80 system.

81

## 82 **Results**

83 *Cells arising from the subventricular zone after stroke are predominantly quiescent precursors*  
84 *and astrocytes*

85 We used genetic lineage tracing to characterize the SVZ cytogenic response to stroke.  
86 Young adult (3-6 months old) *Nestin-CreER*; Ai14 mice were injected with tamoxifen to induce  
87 indelible tdTomato expression in neural stem cells and their progeny (Figure 1A, B) (Benner et  
88 al., 2013; Li et al., 2010). Four weeks later, photothrombotic cortical infarcts were induced, and  
89 tissue was collected two weeks post-stroke, which is a time when large numbers of SVZ-derived  
90 cell are localized to peri-infarct cortex, substantial neural repair is ongoing, and functional  
91 improvement is incomplete (Kannangara et al., 2018; Kim et al., 2018; Williamson et al., 2021).  
92 While no cortical migration was seen in the absence of injury, unilateral strokes induced a  
93 profound migration of tdTomato<sup>+</sup> cells from the SVZ into peri-infarct cortex (Figure 1C, D). We  
94 immunostained tissue to examine expression of an array of differentiation stage-specific and  
95 proliferation-associated proteins in lineage-traced cells (Figure 1E-Q, Supplemental Figure 1,  
96 Supplemental Figure 2).

97 Unexpectedly, the majority of tdTomato<sup>+</sup> cells in peri-infarct cortex expressed precursor  
98 cell-associated markers (93.8±1.1% were CD133<sup>+</sup>, 92.9±1.1% were Sox2<sup>+</sup>, and 66.2±0.7% were  
99 Ascl1<sup>+</sup>). 27.1±1.9% of tdTomato<sup>+</sup> cells were differentiated astrocytes based on expression of  
100 S100β, which defines astrocyte maturation and loss of multipotency (Lattke et al., 2021; Raponi  
101 et al., 2007) and is not expressed by SVZ precursors (Codega et al., 2014). Astrocyte reactivity is  
102 associated with re-expression of some precursor cell-associated proteins, including CD133 and  
103 Sox2 (Götz et al., 2015; Robel et al., 2011), but reactive astrocytes do not express Ascl1

104 (Magnusson et al., 2014; Zamboni et al., 2020). Thus, the *Ascl1*<sup>+</sup> subpopulation defined  
105 undifferentiated precursors, the *S100β*<sup>+</sup> subpopulation defined astrocytes, and *CD133/Sox2*  
106 labeled both subpopulations (Figure 1E). Lineage-traced cells were largely quiescent as defined  
107 by expression of the quiescence marker *Id2* in 92.1±1.5% of cells (Llorens-Bobadilla et al.,  
108 2015), and rare expression of the proliferation marker *Ki67* (4.1±1.5%). Oligodendrocyte-lineage  
109 (*Olig2*<sup>+</sup>, 4.1±0.5%) and neuron-lineage cells (*DCX*<sup>+</sup>, 3.0±0.6%, and *NeuN*<sup>+</sup>, 0.9±0.7%; (also see  
110 Supplemental Figure 2)) made up the remainder of lineage-traced cells. We corroborated these  
111 phenotyping results with parallel experiments in *Ascl1-CreER*; *Ai14* mice, in which a subset of  
112 neural stem and progenitor cells are lineage-traced (Liang et al., 2019) (Supplemental Figure 1).  
113 We also confirmed that few new neurons are formed up to 6 weeks post-stroke using *Nestin-*  
114 *CreER*; *Sun1-sfGFP<sup>fl</sup>* mice in which neural stem cells and their progeny were labeled with a  
115 nuclear membrane-targeted fluorophore (Supplemental Figure 2). These experiments identify  
116 undifferentiated precursors as the predominant cell type produced by the SVZ in response to  
117 stroke. Since the majority of new cells that localize to peri-infarct regions remain in an  
118 undifferentiated state, cell replacement may not be the primary function of the cytogenic  
119 response.



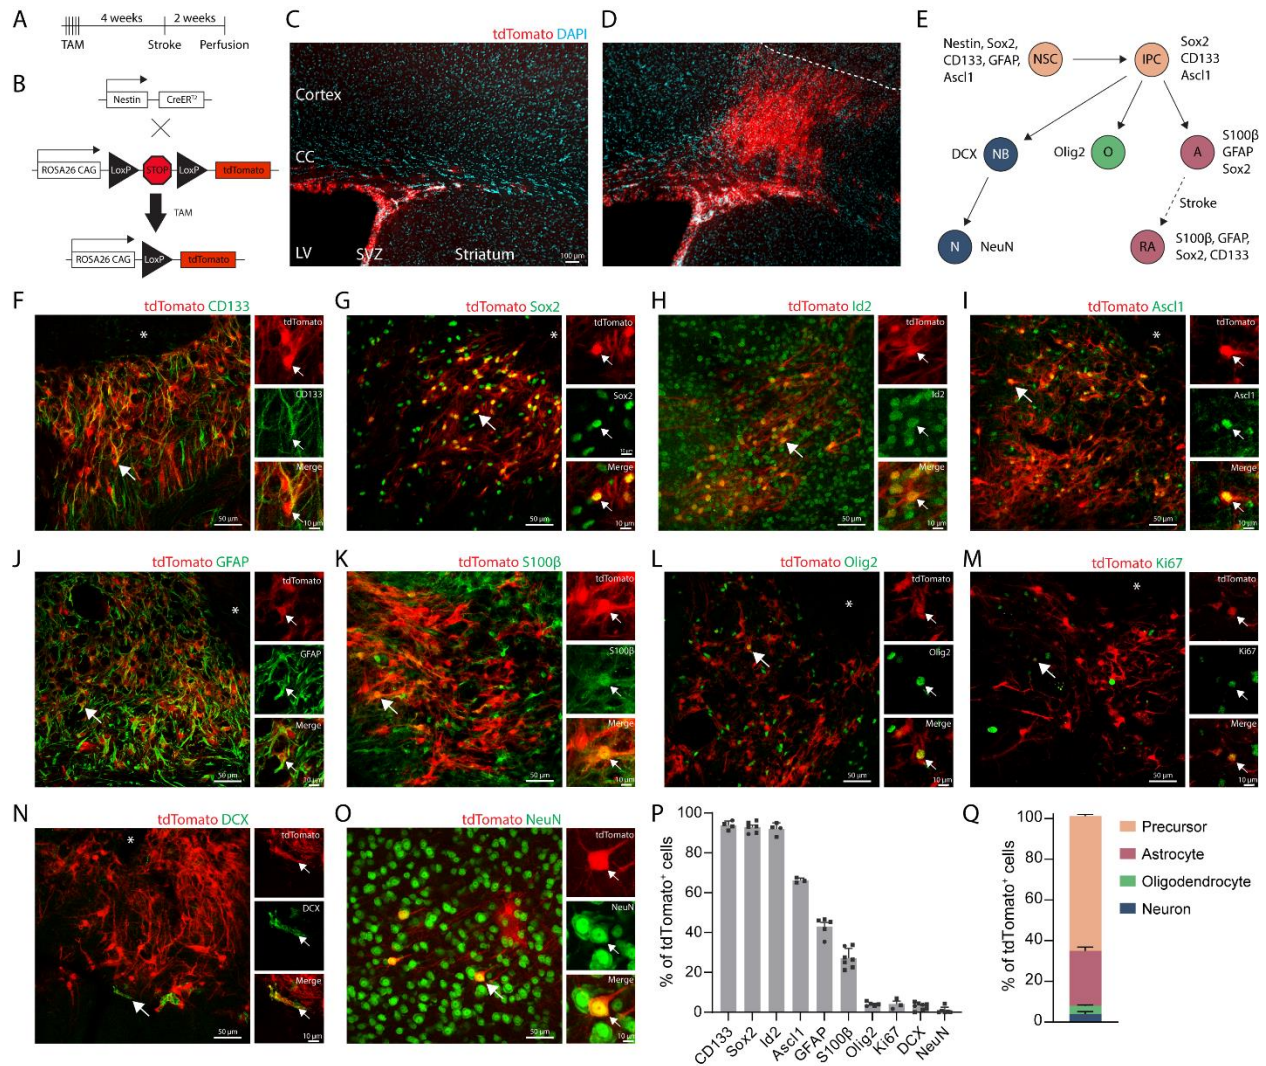

120

121 **Figure 1. SVZ-derived cells are predominantly undifferentiated precursors and astrocytes.**

122 A) Experimental timeline for lineage tracing neural stem cell progeny after stroke. Tissue was  
 123 collected two weeks post-stroke. B) Schematic of inducible, neural stem cell-specific lineage  
 124 tracing system in Nestin-CreER; Ai14 mice. Tamoxifen (TAM) administration induces tdTomato  
 125 expression in neural stem cells and their progeny. C) Image of tdTomato-expressing cells in the  
 126 subventricular zone in the absence of injury. Note the lack of cortical migration of tdTomato<sup>+</sup>  
 127 cells. CC, corpus callosum; LV, lateral ventricle; SVZ, subventricular zone. D) Substantial  
 128 migration of tdTomato<sup>+</sup> cells towards the infarct after cortical photothrombotic stroke (dashed  
 129 line indicates the approximate infarct border). E) Schematic of differentiation stages as defined  
 130 by marker expression. Neural stem cells (NSC) produce intermediate progenitor cells (IPC),  
 131 which give rise to cells of the three major neural lineages: neurons (NB, neuroblast; N, neuron),  
 132 oligodendrocytes (O), and astrocytes (A). After stroke, reactive astrocytes (RA) re-express some  
 133 neural stem cell markers. F-O) Representative confocal images of tdTomato<sup>+</sup> cells and  
 134 immunostaining for lineage and functional markers. Images are from peri-infarct cortex two  
 135 weeks post-stroke. Asterisks indicate the lesion core. Most tdTomato<sup>+</sup> cells (precursors and

136 astrocytes) expressed the stem cell-associated markers CD133 (F) and Sox2 (G), and the  
137 quiescence marker Id2 (H). Id2<sup>+</sup> tdTomato<sup>-</sup> cells include mature resident cortical cells.  
138 Undifferentiated precursors were uniquely identified by expression of Ascl1 (I). J) GFAP  
139 marked astrocytes and a subset of precursors. K) Differentiated astrocytes were defined by  
140 expression of S100 $\beta$ . L) The oligodendrocyte lineage was defined by Olig2 expression. M) Few  
141 cells expressed the proliferation marker Ki67. Neuron lineage cells, DCX<sup>+</sup> (N) and NeuN<sup>+</sup> (O),  
142 were the least common. P) Quantification of marker expression by tdTomato<sup>+</sup> cells. Data are  
143 from n = 3-8 mice per marker, and > 100 tdTomato<sup>+</sup> cells counted per mouse per marker. Q)  
144 Estimate of phenotype distribution of lineage traced cells. Precursors were defined by Ascl1  
145 expression. Astrocytes were defined by S100 $\beta$  expression. Oligodendrocyte lineage was defined  
146 by Olig2 expression. Neuron lineage was defined by DCX and NeuN expression. See also  
147 Supplemental Figure 1 and Supplemental Figure 2. Data are presented as mean  $\pm$  SEM.  
148 Datapoints representing males are shown as circles; datapoints representing females are shown as  
149 squares.

150

### 151 *Chemogenetic ablation of neural stem cells impairs recovery after stroke*

152       Having characterized the phenotype of SVZ-derived cells, we next investigated whether  
153 SVZ cytogenesis provides functional benefits for recovery after stroke. We used GFAP-TK mice  
154 to selectively ablate neural stem cells prior to stroke following an established ganciclovir (GCV)  
155 administration paradigm (Garcia et al., 2004; Swan et al., 2014) (Figure 2A-J). Delivery of GCV  
156 via subcutaneous osmotic pumps for two weeks ablates mitotic TK-expressing cells (i.e. neural  
157 stem cells), but spares non-mitotic GFAP-expressing cells, including cortical astrocytes (Garcia  
158 et al., 2004; Swan et al., 2014) (Figure 2D-F; Supplemental Figure 3A-C). SVZ cytogenesis, as  
159 measured by the density of SVZ DCX<sup>+</sup> and Ki67<sup>+</sup> cells, was substantially reduced in GFAP-  
160 TK+GCV mice relative to littermate controls, which included wildtype mice given saline or  
161 GCV and GFAP-TK mice given saline (Figure 2G-J).

162       Following GCV administration, we compared motor recovery between GFAP-TK mice  
163 and wildtype littermates after photothrombotic cortical infarcts targeting the forelimb area of  
164 motor cortex (Tennant et al., 2011; Williamson et al., 2021) (Figure 2K). Motor function was



165 assessed with the single seed reaching task, a highly sensitive and translationally relevant  
166 measure of skilled reaching (Klein et al., 2012; van Lieshout et al., 2021). There was no  
167 difference between groups in reaching performance during pre-stroke GCV delivery (Bonferroni-  
168 corrected  $p > 0.999$ ). Mice lacking cytogenesis showed significantly worse recovery out to four  
169 weeks following stroke (Figure 2L). Lesion size and location did not differ between groups  
170 (Figure 2M, N). These results demonstrate that SVZ cytogenesis promotes functional recovery  
171 after stroke.

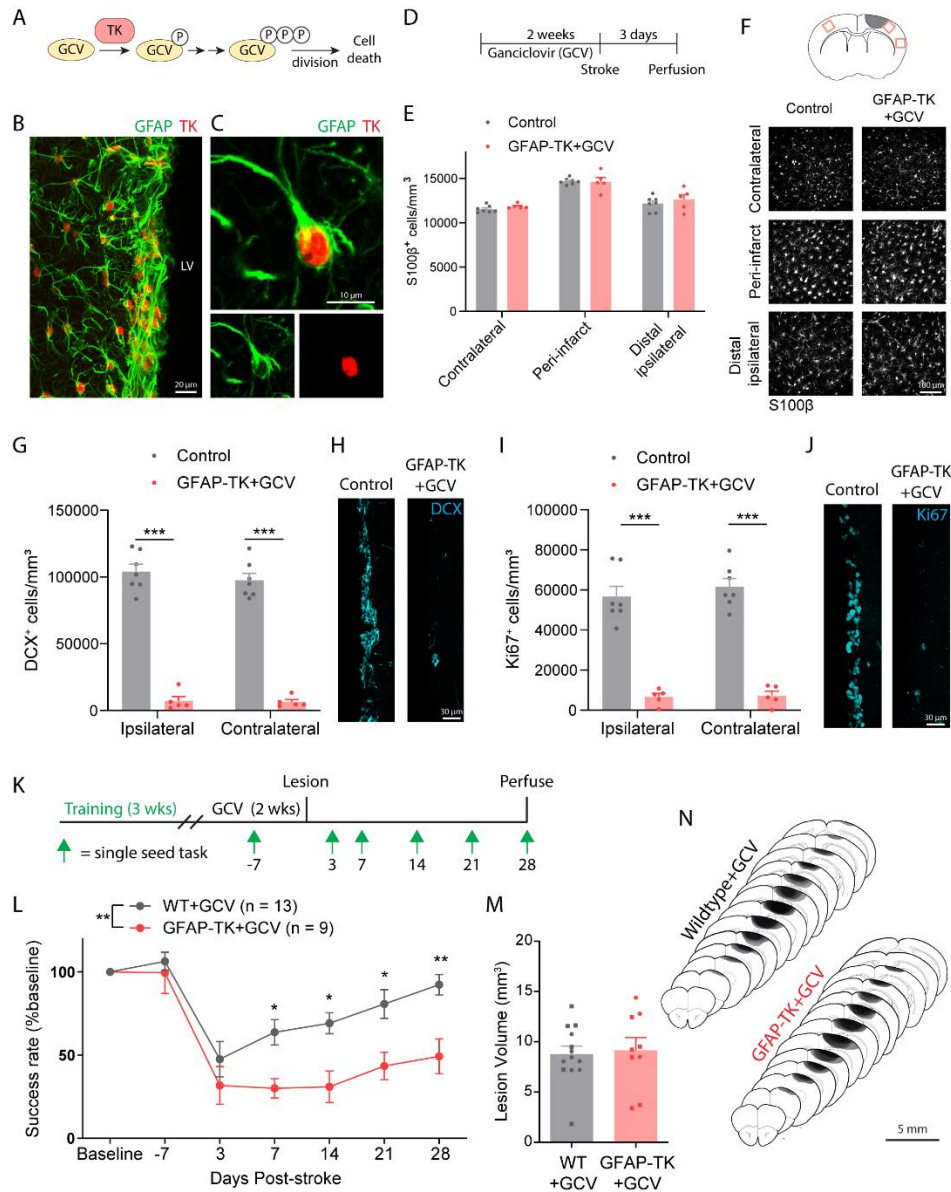

172

173 **Figure 2. Ablation of neural stem cells worsens recovery after stroke.**

174 A) Schematic illustrating the thymidine kinase (TK)/ganciclovir (GCV) system for conditional  
 175 ablation of proliferating cells. B) Confocal image showing TK expression in GFAP<sup>+</sup> cells of the  
 176 subventricular zone in a GFAP-TK mouse. LV, lateral ventricle. C) High-resolution image of a  
 177 TK-expressing SVZ stem cell. D) Experimental timeline for assessing the specificity and  
 178 effectiveness of arresting SVZ cyto genesis with GFAP-TK mice (E-J). GCV or saline was  
 179 delivered for 14 days via osmotic pump. Tissue was collected 3 days after stroke. n = 7 control  
 180 (wildtype mice given GCV or GFAP-TK mice given saline), n = 5 GFAP-TK+GCV. E)  
 181 Parenchymal astrocytes were not depleted in this paradigm. t(10) < 1.53, p ≥ 0.157, t tests  
 182 comparing groups for each region. F) Representative images of S100β<sup>+</sup> cells from three cortical

183 regions (see diagram at top) show lack of astrocyte ablation. G-J) GFAP-TK mice permit  
184 conditional arrest of cytogenesis. The number of SVZ DCX<sup>+</sup> (G, H) and Ki67<sup>+</sup> cells (I, J) was  
185 significantly reduced in GFAP-TK mice given GCV relative to controls. \*\*\*\* $t(10) \geq 7.99$ ,  $p <$   
186  $0.001$ , t tests. K) Experimental design for assessing motor recovery after photothrombotic stroke  
187 with the single seed reaching task ( $n = 13$  wildtype (WT),  $n = 9$  GFAP-TK). L) Arrest of  
188 cytogenesis significantly worsened recovery of motor function. Time x group interaction  $F(6,$   
189  $120) = 3.61$ ,  $p = 0.0025$ . \* $p < 0.05$ , \*\* $p < 0.01$ , Bonferroni tests. M) Lesion volume was not  
190 different between groups.  $t(20) = 0.27$ ,  $p = 0.787$ . N) Lesion reconstruction. Darker shades  
191 represent more overlap between animals. Data are presented as mean  $\pm$  SEM. Where individual  
192 datapoints are shown, datapoints representing males are shown as circles; datapoints representing  
193 females are shown as squares.

194

### 195 *Aging diminishes the SVZ cytogenic response to stroke and its functional benefits*

196 Aging is associated with a substantially higher incidence of stroke (Kissela et al., 2012)  
197 and reduced recovery of function (Paolucci et al., 2003). In animals, aging is associated with  
198 diminished SVZ cytogenesis (Bouab et al., 2011; Jin et al., 2004; Kalamakis et al., 2019; Luo et  
199 al., 2006). We examined the impact of aging on normal and post-stroke SVZ cytogenesis by  
200 comparing young adult (aged 3-6 months) and aged (12-16 months) *Nestin-CreER*; Ai14 mice.  
201 Mice were either uninjured (naïve) or subjected to cortical stroke two weeks prior to tissue  
202 collection. In young mice, stroke increased the number of Ki67<sup>+</sup> proliferative cells and  
203 tdTomato<sup>+</sup>Sox2<sup>+</sup> precursors in the SVZ relative to young naïve, aged naïve, and aged stroke mice  
204 (Figure 3A-D). By contrast, in aged mice, there was no significant difference in the number of  
205 SVZ Ki67<sup>+</sup> or tdTomato<sup>+</sup>Sox2<sup>+</sup> cells after stroke relative to naïve mice ( $p = 0.604$ ,  $p = 0.998$ ,  
206 respectively, Tukey tests). Thus, stroke increases SVZ proliferation and expands the precursor  
207 cell pool in young, but not aged, mice.

208 We next examined the effects of aging on the migratory response of lineage-traced SVZ  
209 cells after stroke. The density of tdTomato<sup>+</sup> cells in peri-infarct cortex two weeks post-stroke  
210 was about five-fold lower in aged mice relative to young mice (Figure 3E, F). Despite the

211 diminished cytogenic response, the phenotype distribution of tdTomato<sup>+</sup> cells in peri-infarct  
212 cortex of aged mice (Figure 3G) was similar to what we observed in young adult mice (Figure 1),  
213 with the majority of cells identified as precursors and astrocytes. Thus, far fewer SVZ-derived  
214 cells localize to peri-infarct regions in aged mice, but their phenotype distribution is similar to  
215 that of young mice.

216 We next investigated whether the blunted cytogenic response observed in aged mice was  
217 still functionally beneficial (Figure 3H). We used GFAP-TK mice to selectively ablate neural  
218 stem cells prior to stroke. BrdU pulse labeling of proliferating cells revealed a near complete loss  
219 of BrdU<sup>+</sup> cells in the SVZ of GFAP-TK+GCV mice relative to control aged mice (Figure 3I, J;  
220 all mice aged 12-16 months). We assessed motor recovery with the single-seed task and found no  
221 differences between groups (Figure 3K). Notably, both aged groups performed significantly  
222 worse on day 28 than young mice within intact cytogenesis (data from Figure 2;  $F(3, 35) = 7.46$ ,  
223  $p < 0.001$  one-way ANOVA;  $p < 0.012$ , Tukey tests), but similarly to young GFAP-TK+GCV  
224 mice ( $p > 0.978$ , Tukey tests). Lesion size was not different between aged groups (Figure 3L,  
225 M), and was similar to that of young adults (Figure 2M, N). Altogether, our results indicate that  
226 aging diminishes the cytogenic response to stroke and its functional benefits. Together with our  
227 findings in young mice, our results show that reduced SVZ cytogenesis, by neural stem cell  
228 ablation or aging, is associated with worse functional recovery. Reduced cytogenesis may  
229 contribute to worse outcome after stroke with aging.

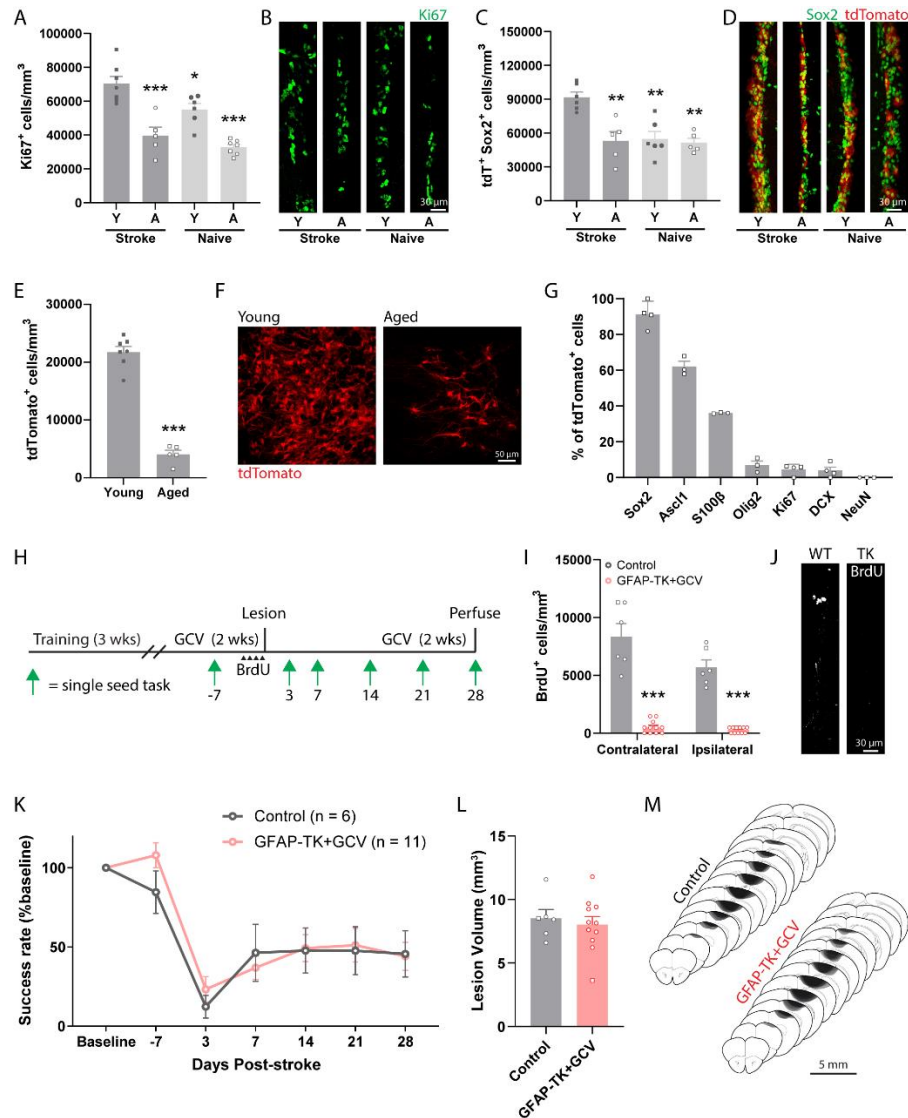

230

231 **Figure 3. Aging diminishes the cytogenic response to stroke and its contribution to**  
 232 **recovery.**

233 A-D) Assessment of SVZ cytogenesis in young (Y, 3-6 months) and aged (A, 12-16 months)  
 234 Nestin-CreER; Ai14 mice (n = 5-7 mice/group). Tissue was collected two weeks post-stroke.  
 235 The number of proliferating cells (Ki67<sup>+</sup>, A and B) and neural precursor cells (tdTomato<sup>+</sup> Sox2<sup>+</sup>,  
 236 C and D) in the SVZ was significantly higher in young mice after stroke compared to all other  
 237 groups. \*p < 0.05, \*\*p < 0.01, \*\*\*p < 0.001 relative to young stroke mice, Tukey tests. E)  
 238 Fewer tdTomato<sup>+</sup> cells were observed in peri-infarct cortex of aged mice two weeks post-stroke.  
 239 \*\*\*t(10) = 13.4, p < 0.001. F) Representative images of tdTomato<sup>+</sup> cells in peri-infarct cortex. G)  
 240 Quantification of lineage marker expression by tdTomato<sup>+</sup> cells in peri-infarct cortex of aged  
 241 mice at two weeks post-stroke (n = 3-4 mice per marker). Similar to what was observed in young  
 242 mice (Figure 1), most SVZ-derived cells were undifferentiated precursors or astrocytes. H)  
 243 Experimental timeline for examining the effects of neural stem cell ablation in aged mice (n = 6

244 controls, n = 11 GFAP-TK given GCV). I) GFAP-TK+GCV mice had fewer BrdU<sup>+</sup> cells in the  
245 SVZ, validating stem cell ablation. \*\*\* $t(15) \geq 9.36$ ,  $p < 0.001$ . BrdU was given twice per day for  
246 two days prior to stroke. J) Representative images of BrdU immunostaining in the SVZ. K) Both  
247 aged controls and GFAP-TK+GCV mice showed poor recovery following stroke. There was no  
248 difference between groups. Group main effect  $F(1,15) = 0.17$ ,  $p = 0.690$ . L) Lesion volume was  
249 not different between groups ( $t(15) = 0.50$ ,  $p = 0.628$ ). M) Lesion reconstruction. Darker shades  
250 represent more overlap between animals. Data are presented as mean  $\pm$  SEM. Where individual  
251 datapoints are shown, datapoints representing males are shown as circles; datapoints representing  
252 females are shown as squares.

253

### 254 *Arrest of cytogenesis disrupts neuronal and vascular repair*

255         Our results indicate that most SVZ-derived cells are undifferentiated precursors and  
256 reactive astrocytes. We hypothesized that these cell types may influence repair processes to  
257 promote behavioral improvement. In particular, synaptic plasticity and vascular remodeling are  
258 two functionally important aspects of neural repair that could potentially be augmented by  
259 factors produced by SVZ-derived cells. Indeed, past studies have demonstrated beneficial effects  
260 of transplanted stem cells and resident cortical astrocytes on these processes (Andres et al., 2011;  
261 Bacigaluppi et al., 2016; Horie et al., 2011; Lin et al., 2017; Llorente et al., 2021; Pluchino et al.,  
262 2005; Roitbak et al., 2011; Sabelström et al., 2013; Williamson et al., 2021).

263         We investigated the consequences of neural stem cell ablation on synaptic and vascular  
264 plasticity in residual cortex surrounding photothrombotic infarcts with a longitudinal imaging  
265 approach (Figure 4A, B). We bred GFAP-TK mice with Thy1-GFP mice, which have sparse,  
266 GFP-labeled pyramidal neurons. Resulting double transgenic mice allowed us to monitor  
267 synaptic remodeling at single-synapse resolution with repeated 2-photon imaging of dendritic  
268 spines on apical dendrites before and after stroke (Brown et al., 2007; Clark et al., 2019;  
269 Mostany et al., 2010) with the ability to conditionally arrest cytogenesis. Blood flow was tracked  
270 with multi-exposure speckle imaging (MESI), a quantitative, optical, contrast-free technique that



271 yields high-resolution blood flow maps (He et al., 2020; Williamson et al., 2020). Prior to stroke,  
272 control and TK<sup>+/-</sup> mice were unilaterally implanted with cranial windows, trained on the single-  
273 seed reaching task, administered GCV or saline, and subjected to baseline imaging. We then  
274 induced strokes in forelimb motor cortex and periodically imaged dendritic spines and blood  
275 flow and assessed behavioral performance during recovery.

276 Motor recovery was again significantly impaired in GFAP-TK+GCV mice, with no  
277 differences in lesion size observed between groups (Figure 4C-E). 2-photon imaging of dendritic  
278 spines revealed increased spine turnover in peri-infarct cortex (Figure 4F-H), consistent with past  
279 work (Brown et al., 2007; Clark et al., 2019; Joy et al., 2019; Mostany et al., 2010). There were  
280 no group differences in spine dynamics before stroke (Supplemental Figure 4). New spine  
281 formation peaked during the second week after stroke, and was significantly higher in mice with  
282 intact cytotogenesis. Spine elimination was greatest during the first week post-stroke, and  
283 subsequently declined with time, without significant differences between groups. A  
284 subpopulation of new spines formed after stroke persists long-term, and the persistence of newly  
285 formed spines is associated with greater functional recovery (Clark et al., 2019). The survival of  
286 new spines was significantly reduced in GFAP-TK+GCV mice regardless of the day of spine  
287 formation (Figure 4I). Moreover, spine survival rate was positively correlated with behavioral  
288 performance on the final assessment day (Figure 4J). Thus, SVZ cytotogenesis supports synaptic  
289 remodeling after stroke, particularly by promoting the long-term stabilization of new synapses.

290 Broad regions of reduced blood flow persist for days to weeks surrounding focal strokes  
291 (He et al., 2020; Williamson et al., 2020). Remodeling of peri-infarct vasculature helps to restore  
292 blood flow and is associated with behavioral improvement (Williamson et al., 2020). To examine  
293 vascular remodeling, we injected mice with fluorophore-conjugated tomato lectin immediately

294 before euthanasia to label perfused vasculature. Vessel density in peri-infarct cortex was  
295 significantly reduced in GFAP-TK+GCV mice relative to controls (Figure 4K, L). Furthermore,  
296 longitudinal blood flow imaging demonstrated impaired recovery of blood flow at days 5 and 28  
297 post-stroke (Figure 4M, N). Early vascular permeability was not affected by arresting  
298 cytotogenesis (Supplemental Figure 3). Overall, these findings demonstrate that SVZ-derived cells  
299 beneficially shape neuronal and vascular remodeling processes after stroke in order to promote  
300 recovery.

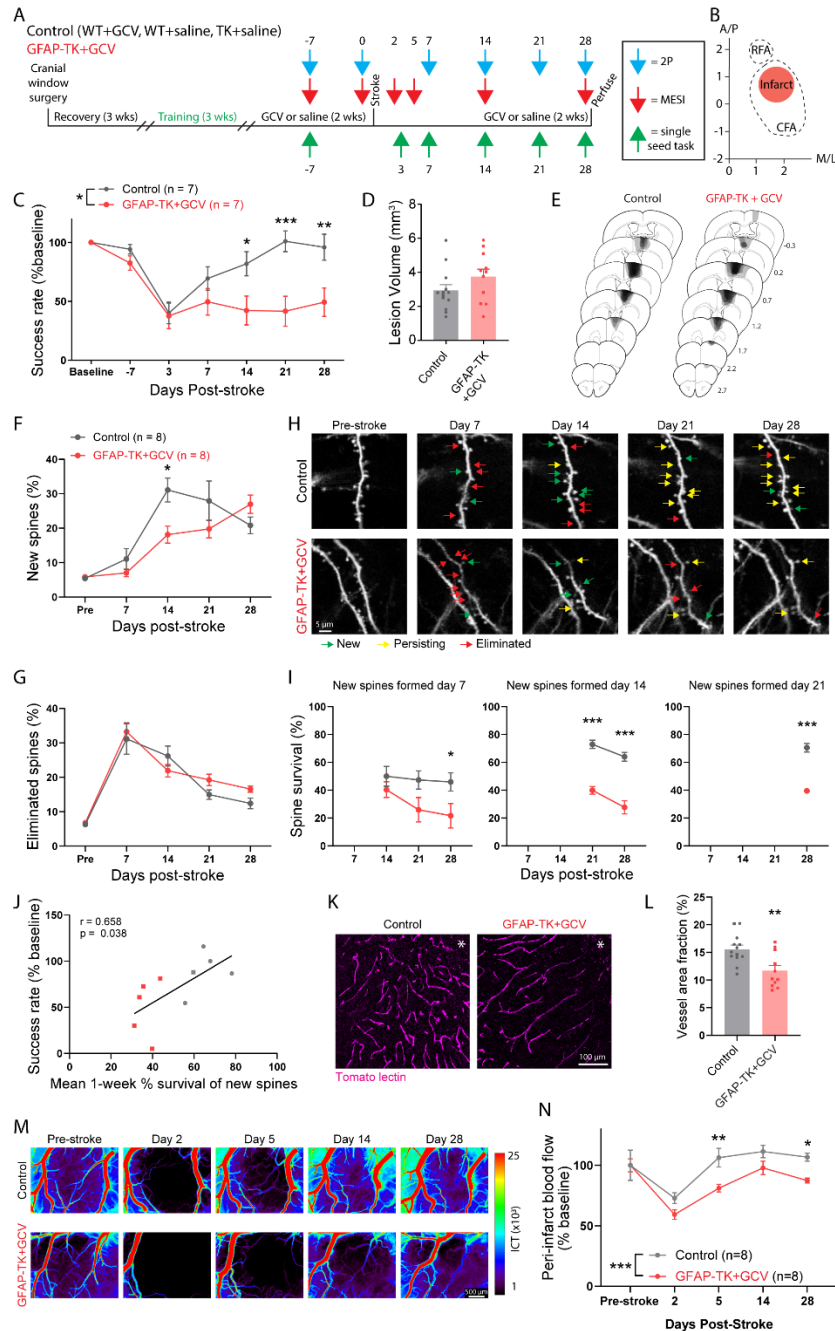

301

## 302 **Figure 4. SVZ cytotgenesis supports neuronal and vascular remodeling.**

303 A) Experimental design for longitudinal imaging and behavioral testing. Subgroups of mice were  
304 subjected to longitudinal imaging and behavioral testing (n = 5/group), imaging only (n =  
305 3/group), behavioral testing only (n = 2/group), and neither (histology only; n = 3 control, n = 1  
306 GFAP-TK+GCV). B) Schematic illustrating infarct placement relative to caudal (CFA) and  
307 rostral (RFA) forelimb areas in motor cortex. Axes indicate mm relative to Bregma. C)  
308 Performance on the single-seed reaching task. GFAP-TK+GCV mice showed significantly worse

309 recovery relative to control mice (significant group x time interaction,  $F(6, 72) = 4.7$ ,  $p < 0.001$ ).  
310 \* $p < 0.05$ , \*\* $p < 0.01$ , \*\*\* $p < 0.001$ , Bonferroni tests. D) Lesion volume was not different  
311 between groups ( $t(22) = 1.5$ ,  $p = 0.159$ ). E) Lesion reconstructions. Darker shades represent more  
312 overlap between animals. F-J) Longitudinal imaging of dendritic spines revealed altered spine  
313 dynamics in mice with ablated neural stem cells. F) New spine formation was significantly  
314 higher in control mice on day 14 (significant time x group interaction,  $F(4,52) = 4.1$ ,  $p = 0.006$ ).  
315 \* $p < 0.05$ , Sidak's multiple comparison tests between groups for each day. G) Spine elimination  
316 was not significantly different between groups (group effect,  $F(1, 66) = 1.2$ ,  $p = 0.285$ ). H)  
317 Longitudinal 2-photon images of GFP-expressing dendritic spines illustrating spine formation  
318 (green arrows), persistence of new spines (yellow arrows), and spine elimination (red arrows). I)  
319 Survival of new spines was significantly reduced in GFAP-TK+GCV mice. Plots show survival  
320 of new spines formed on days 7, 14, and 21 after stroke. \* $p < 0.05$ , \*\*\* $p < 0.001$ , Sidak's  
321 multiple comparison tests. J) Spine survival was significantly positively correlated with  
322 behavioral performance on the final day of testing. K) Representative images of peri-infarct  
323 vasculature. L) Peri-infarct vessel density was significantly reduced in GFAP-TK+GCV mice  
324 (\*\* $t(22) = 3.3$ ,  $p = 0.004$ ). M) Representative MESI images of blood flow. N) Peri-infarct blood  
325 flow was significantly reduced on days 5 and 28 in GFAP-TK+GCV mice (group effect,  $F(1, 14)$   
326  $= 32.98$ ,  $p < 0.001$ ). \* $p < 0.05$ , \*\* $p < 0.01$ , Sidak's multiple comparison tests. Data are presented  
327 as mean  $\pm$  SEM. Where individual datapoints are shown, datapoints representing males are  
328 shown as circles; datapoints representing females are shown as squares.

329

### 330 *SVZ-derived cells interact with vasculature and produce trophic factors*

331 Neuroblasts originating in the SVZ migrate along vascular scaffolds towards the  
332 olfactory bulb in the healthy brain (Bovetti et al., 2007) and towards peri-infarct regions after  
333 stroke (Ohab et al., 2006; Thored et al., 2007). We observed frequent contact between lineage-  
334 traced SVZ progeny and blood vessels in peri-infarct cortex, including contact of nearby vessels  
335 by the processes or cell bodies of 88.2% of SVZ-derived cells (Figure 5A-C). Thus, contact with  
336 blood vessels may underlie some of the reparative effects of SVZ-derived cells. In addition,  
337 stroke may induce expression of migratory cues in endothelial cells to drive migration of  
338 reparative cells from the SVZ (Ohab et al., 2006).

339 Transplanted neural precursors of various sources and in diverse disease settings have  
340 been reported to express trophic factors, which may be implicated in their therapeutic effects

341 (Andres et al., 2011; Bacigaluppi et al., 2009; Drago et al., 2013; Horie et al., 2011; Llorente et  
342 al., 2021; Martino and Pluchino, 2006; Roitbak et al., 2011). To prospectively investigate  
343 molecular mechanisms underlying the facilitation of post-stroke repair by SVZ cytotogenesis, we  
344 examined the expression of four trophic factors known to drive neuronal and vascular growth.  
345 ~90% of all SVZ-derived lineage traced cells in peri-infarct cortex expressed VEGF, BDNF,  
346 GDNF, and FGF2 (Figure 5D-H). We compared relative abundance of each of these proteins in  
347 peri-infarct cortex between control and GFAP-TK+GCV mice at 28 days post-stroke to evaluate  
348 production of these factors by SVZ-derived cells relative to other cell types. VEGF protein was  
349 significantly reduced in GFAP-TK+GCV mice, indicating that SVZ-derived cells are a major  
350 source of VEGF (Figure 5I). Notably, among SVZ-derived cells, all lineages except for new  
351 neurons produced VEGF (Figure 5J). These findings suggest that SVZ cytotogenesis may facilitate  
352 neural repair at least in part through production of trophic factors, particularly VEGF.

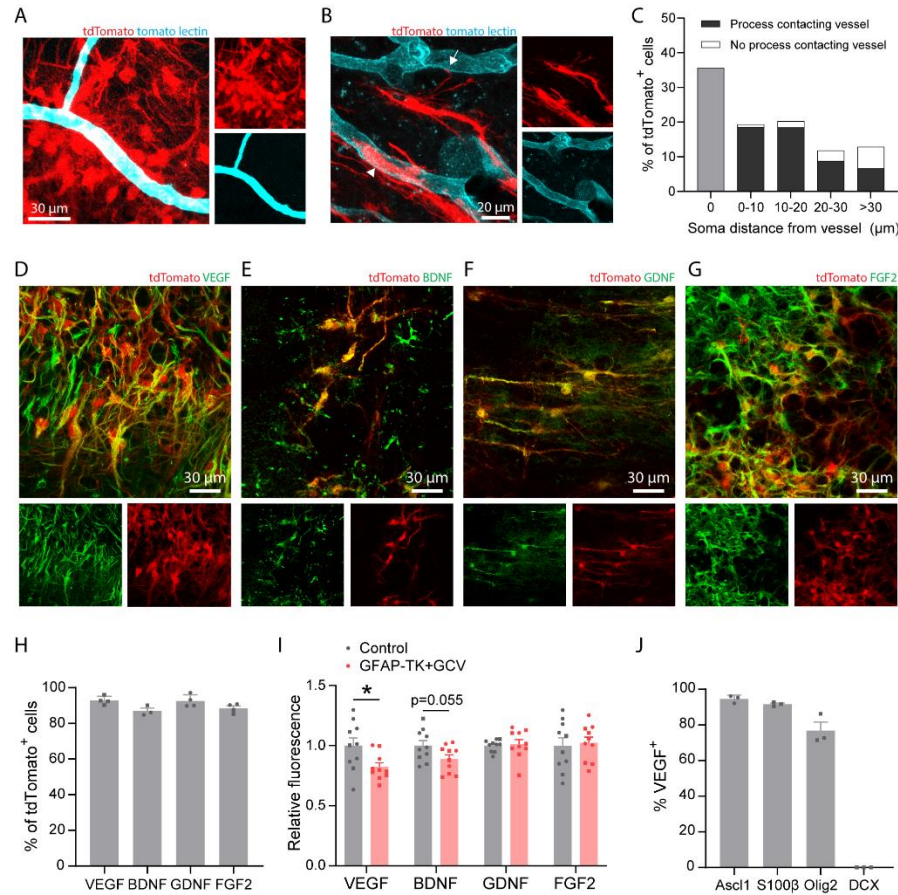

353

354 **Figure 5. SVZ-derived cells interact with vasculature and produce trophic factors.**

355 A) Confocal image showing clustering of lineage traced cells around blood vessels in peri-infarct  
356 cortex. B) tdTomato-expressing cells were frequently observed with cell bodies abutting vessels  
357 (arrowhead) or extending processes that terminated on nearby vessels (arrow). C) Quantification  
358 of SVZ-derived cell interaction with vasculature in peri-infarct cortex two weeks post-stroke.  
359 Data are from 661 cells across 3 Nestin-CreER; Ai14 mice. D-G) Confocal images from peri-  
360 infarct cortex showing expression of the trophic factors VEGF (D), BDNF (E), GDNF (F), and  
361 FGF2 (G) in tdTomato+ cells. H) Quantification of trophic factor expression in tdTomato+ cells.  
362 I) Quantification of trophic factor expression in peri-infarct cortex four weeks post-stroke  
363 between control mice and GFAP-TK+GCV mice (n = 10/group). Fluorescence intensity is  
364 reported relative to controls. VEGF protein fluorescence was significantly reduced in GFAP-  
365 TK+GCV mice. \*t(18) = 2.4, p = 0.025. J) Quantification of VEGF expression by phenotype in  
366 lineage traced cells. VEGF was expressed by Ascl1+ precursors, S100β+ astrocytes, and Olig2+  
367 oligodendrocyte-lineage cells, but not by neuronal lineage cells (DCX+). Data are presented as  
368 mean ± SEM. Where individual datapoints are shown, datapoints representing males are shown  
369 as circles; datapoints representing females are shown as squares.

370

371 *Conditional deletion of Vegf in adult neural stem cells impairs recovery and repair*



372 VEGF promotes the growth of blood vessels and neurons (Gerber et al., 1999; Raab et  
373 al., 2004; Rosenstein et al., 2003; Sun et al., 2003). We next investigated whether VEGF  
374 produced by SVZ-derived cells was involved in post-stroke recovery and repair. We generated  
375 *Nestin-CreER; Vegf<sup>fl/fl</sup>* mice to permit inducible deletion of *Vegf* in adult neural stem cells and  
376 their progeny (VEGF cKO; Figure 6A). Lineage tracing in *Nestin-CreER; Vegf<sup>fl/fl</sup>; Ai14* mice  
377 showed a near complete loss of VEGF in tdTomato<sup>+</sup> cells in peri-infarct cortex, but no change in  
378 the number of migratory cells relative to controls at two weeks post-stroke (Figure 6B-E).  
379 Recovery of forelimb motor function was significantly worse in VEGF cKO mice relative to  
380 controls as measured with the single-seed reaching task (Figure 6F). Lesion size and location  
381 were not different between groups (Supplemental Figure 5). Vascular remodeling following  
382 stroke is seen by increases in peri-infarct vascular density (Williamson et al., 2021, 2020). While  
383 vessel density in peri-infarct cortex was increased in control mice relative to the contralateral  
384 hemisphere, this was not seen in VEGF cKO mice, and peri-infarct vessel density in VEGF cKO  
385 mice was reduced relative to controls (Figure 6G, H). We injected mice with BrdU daily during  
386 the peak in angiogenesis from days 5-10 after stroke to quantify new vessel formation. The  
387 number of new endothelial cells (BrdU<sup>+</sup>ERG<sup>+</sup>) was significantly reduced in VEGF cKO mice,  
388 confirming impaired angiogenesis in mice lacking VEGF in SVZ-derived cells.

389 In a separate experiment, we examined the effects of conditional *Vegf* deletion on  
390 dendritic spine density after stroke (Figure 6K). Peri-infarct layer V cortical pyramidal neurons  
391 were labeled by injections of AAV5-CaMKIIa-eGFP (Figure 6L). Four weeks post-stroke, we  
392 quantified spine density on apical dendrites in layer II/III. We previously found that changes in  
393 spine density in this region parallel functional recovery (Clark et al., 2019). Spine density was  
394 significantly reduced in VEGF cKO mice (Figure 6M, N). Altogether, our results identify VEGF

395 produced by SVZ-derived cells as a key driver of repair and recovery after stroke. More broadly,  
 396 our findings position newborn cells arising from the SVZ in response to injury as a unique  
 397 cellular source of trophic support that instructs neural repair.  
 398

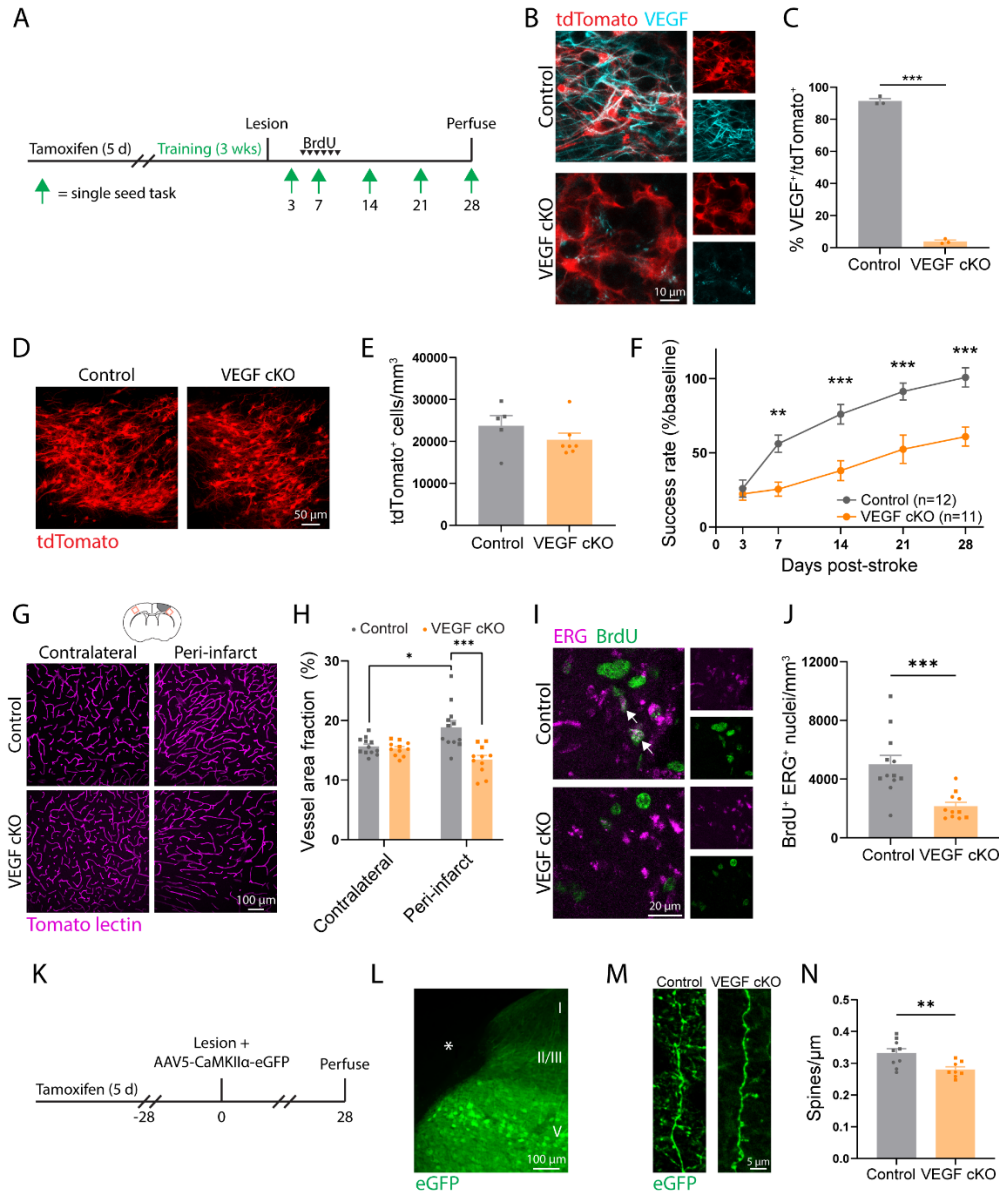

399  
 400 **Figure 6. Adult neural stem cell-specific deletion of *Vegf* impedes recovery and repair.**

401 A) Timeline of experiments to examine recovery in control (Nestin-CreER<sup>+/-</sup>; VEGF<sup>fl/+</sup>, Nestin-  
 402 CreER<sup>-/-</sup>; VEGF<sup>fl/+</sup>, or Nestin-CreER<sup>+/-</sup>; VEGF<sup>+/+</sup>) and VEGF cKO (Nestin-CreER<sup>+/-</sup>; VEGF<sup>fl/fl</sup>)

403 mice. B) Confocal images demonstrating VEGF loss in tdTomato<sup>+</sup> cells in Nestin-CreER<sup>+/+</sup>;  
404 VEGF<sup>fl/fl</sup>; Ai14 mice. Images are from peri-infarct cortex two weeks post-stroke. C)  
405 Substantially fewer tdTomato<sup>+</sup> cells express VEGF in VEGF cKO mice. n = 3 mice/group.  
406 \*\*\*t(4) = 51.23, p < 0.001. D) Representative images of tdTomato<sup>+</sup> cells in peri-infarct cortex  
407 two weeks post-stroke. (E) There was no difference in peri-infarct tdTomato<sup>+</sup> cell density  
408 between controls and VEGF cKO mice, indicating that the cytogenic response was unaffected. n  
409 = 5 controls, n = 7 VEGF cKO. t(10) = 1.18, p = 0.266. F) VEGF cKO significantly impaired  
410 motor recovery measured with the single-seed reaching task (n= 12 control, n = 11 VEGF cKO).  
411 Time x group interaction F(4, 84) = 9.2, p < 0.001. \*\*p < 0.01, \*\*\*p < 0.001, Sidak's tests  
412 between group for each timepoint. G) Representative confocal images and quantification (H) of  
413 vasculature show that VEGF cKO markedly reduced peri-infarct vessel density relative to  
414 control mice. \*\*\*t(21) = 4.1, p < 0.001. Within control mice, peri-infarct vessel density was  
415 significantly greater than in contralateral cortex, consistent with stroke-induced  
416 neovascularization. \*t(22) = 2.8, p = 0.011. By contrast, VEGF cKO mice had diminished vessel  
417 density in peri-infarct cortex relative to the intact contralateral cortex, indicating a failure of  
418 neovascularization (t(20) = 2.3, p = 0.030). I) Representative confocal images of new endothelial  
419 cells (BrdU<sup>+</sup> ERG<sup>+</sup>) in peri-infarct cortex. J) The number of BrdU<sup>+</sup> ERG<sup>+</sup> nuclei was  
420 significantly less in VEGF cKO mice. \*\*\*t(15.0) = 4.2, p < 0.001, Welch's corrected t-test. K)  
421 Timeline of experiments for evaluating peri-infarct spine density in control (n =9) and VEGF  
422 cKO (n = 8) mice. L) Layer V pyramidal neurons were labeled by intracortical injections of  
423 AAV5-CaMKii $\alpha$ -eGFP. Image shows eGFP labeling in peri-infarct cortex. Asterisk indicates  
424 lesion core. M) Representative images and quantification (N) of dendritic spine density. Spine  
425 density was significantly lower in VEGF cKO mice. \*\*t(15) = 3.0, p = 0.009. Apical dendrites  
426 were sampled from layer II/III between 100-700  $\mu$ m from the infarct border. 2631 spines were  
427 counted along 7.9 mm total length of dendrite in controls. 1934 spines were counted along 6.9  
428 mm total length of dendrite in cKO mice. Data are presented as mean  $\pm$  SEM. Where individual  
429 datapoints are shown, datapoints representing males are shown as circles; datapoints representing  
430 females are shown as squares.

431

432 *AAV-mediated expression of VEGF in peri-infarct cortex enhances recovery in mice with*

433 *arrested cytotogenesis*

434 We next tested whether replacement of VEGF would be sufficient to enhance recovery in

435 mice in which cytotogenesis was arrested. GFAP-TK mice were trained on the single-seed

436 reaching task and administered GCV to ablate neural stem cells. Immediately after stroke, mice

437 were injected with either AAV5-EF1 $\alpha$ -VEGF-P2A-eGFP (AAV-VEGF-eGFP), to induce VEGF

438 and eGFP expression, or AAV5-EF1 $\alpha$ -eGFP (AAV-eGFP), to induce only eGFP expression, into

439 layer V of peri-infarct cortex (Figure 7A-C). AAV-VEGF-eGFP induced rapid and sustained  
440 motor recovery as measured by the single-seed reaching task, whereas AAV-eGFP injected mice  
441 showed little improvement up to four weeks post-stroke (Figure 7D). Lesion size and location  
442 were not different between groups (Supplemental Figure 6). We examined vascular density in  
443 homotopic contralateral and peri-infarct cortex 28 days post-stroke. Vascular density was  
444 significantly greater in peri-infarct cortex of AAV-VEGF-eGFP injected mice relative to AAV-  
445 eGFP mice (Figure 7E, F). Moreover, there was no difference in vascular density between  
446 contralateral and peri-infarct cortex in the AAV-eGFP group, indicating a failure of  
447 neovascularization ( $t(22) = 0.97$ ,  $p = 0.344$ ). Mice were given daily injections of BrdU during  
448 days 5-10 post-stroke to label new blood vessels. AAV-VEGF-eGFP mice had substantially  
449 more angiogenesis in peri-infarct cortex than AAV-eGFP mice as measured by the number of  
450 BrdU<sup>+</sup>ERG<sup>+</sup> nuclei (Figure 7G, H). Finally, we examined spine density of eGFP-expressing  
451 pyramidal neurons on apical dendrites in layer II/III. Spine density was significantly higher in  
452 mice given AAV-VEGF-eGFP (Figure 7I, J). In wildtype mice subjected to a sham stroke  
453 procedure, AAV-VEGF-eGFP increased vessel density but did not affect motor function  
454 (Supplemental Figure 7). Overall, our findings indicate that replacement of VEGF is sufficient to  
455 enhance repair and recovery in mice lacking cytogeneration. More broadly, these findings suggest  
456 that replacement of factors produced by SVZ-derived cells may constitute an effective therapy.

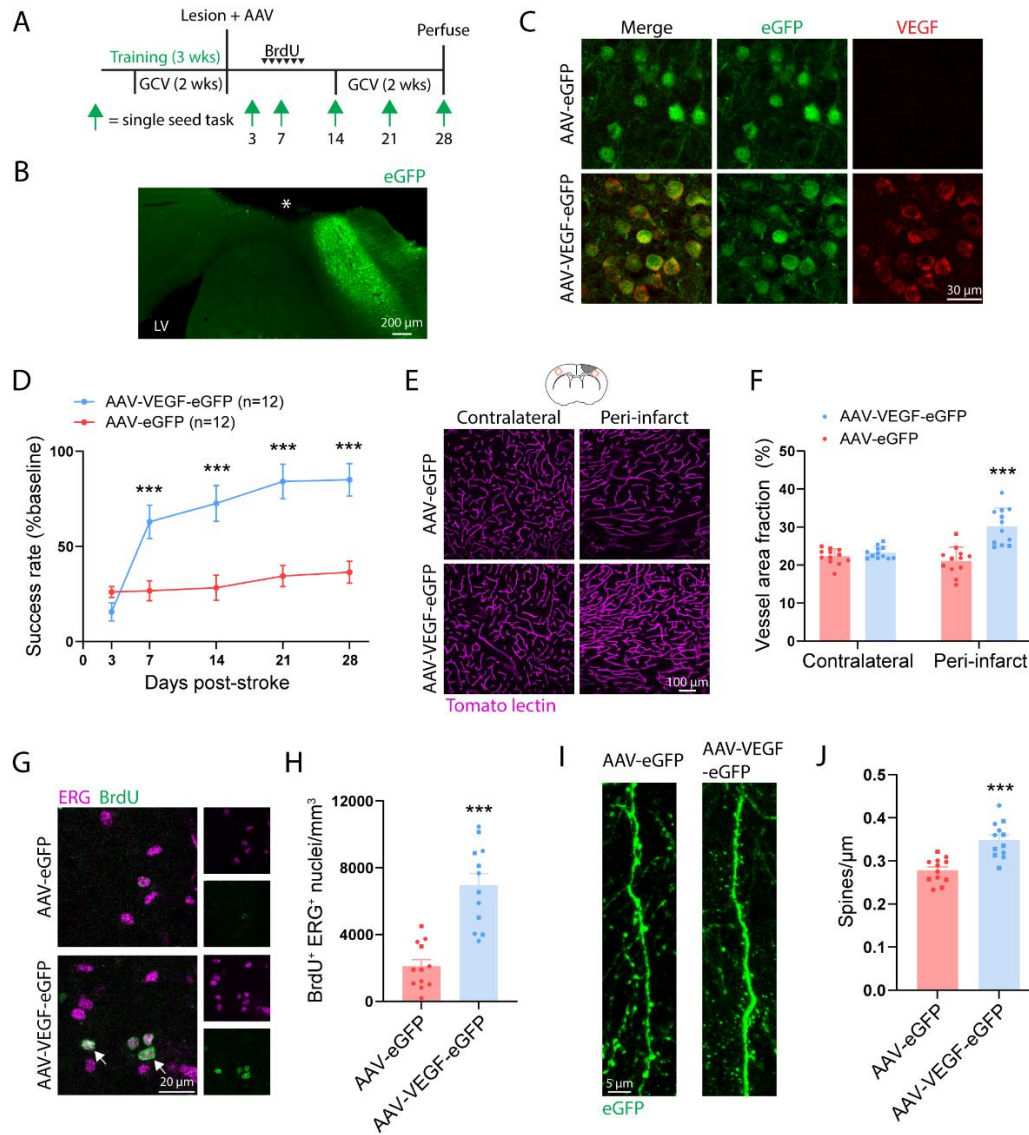

457

458 **Figure 7. VEGF rescues poor recovery due to neural stem cell ablation.**

459 A) Experimental timeline. Both groups used GFAP-TK mice given GCV to ablate neural stem  
 460 cells (n = 12 mice per group). Animals were injected with either AAV5-Ef1 $\alpha$ -eGFP (AAV-  
 461 eGFP) or AAV5-Ef1 $\alpha$ -VEGF-P2A-eGFP (AAV-VEGF-eGFP) in layer V of peri-infarct cortex.  
 462 B) Image illustrating AAV targeting of peri-infarct cortex. Asterisk indicates lesion core. LV,  
 463 lateral ventricle. C) Confocal images validating that AAV-VEGF-eGFP induces VEGF  
 464 expression. D) AAV-VEGF-eGFP improved motor recovery on the single seed reaching task.  
 465 Significant time x group interaction  $F(4, 88) = 15.9, p < 0.001$ . \*\*p < 0.01, \*\*\*p < 0.001,  
 466 Sidak's multiple comparison tests. E) Representative confocal images and quantification (F) of  
 467 vasculature show that AAV-VEGF-eGFP increased peri-infarct vessel density relative to AAV-  
 468 eGFP mice. \*\*\*t(22) = 5.3, p < 0.001, t test. G) Representative confocal images of new  
 469 endothelial cells (BrdU<sup>+</sup> ERG<sup>+</sup>, arrows) in peri-infarct cortex. H) The number of BrdU<sup>+</sup> ERG<sup>+</sup>

470 nuclei was significantly greater in AAV-VEGF-eGFP mice.  $***t(22) = 6.0, p < 0.001$ . I)  
471 Representative images and quantification (J) of dendritic spine density. Spine density was  
472 significantly higher in AAV-VEGF-eGFP mice.  $***t(22) = 4.8, p < 0.001$ . Apical dendrites were  
473 sampled from layer II/III between 100-800  $\mu\text{m}$  from the infarct border. 2825 spines were counted  
474 along 10.2 mm total length of dendrite in AAV-eGFP mice. 3231 spines were counted along 9.3  
475 mm total length of dendrite in AAV-VEGF-eGFP mice. Data are presented as mean  $\pm$  SEM.  
476 Where individual datapoints are shown, datapoints representing males are shown as circles;  
477 datapoints representing females are shown as squares.



## 478 **Discussion**

479           Our study revealed that a previously underappreciated class of cells, undifferentiated  
480 precursors, constitutes the majority of cells that arise from the SVZ and migrate towards the site  
481 of injury following stroke. The migration of primarily undifferentiated cells towards the site of  
482 injury suggests that the main function of post-injury cytogenesis is likely not cell replacement.  
483 We found that reducing SVZ cytogenesis, by neural stem cell ablation or aging, leads to poor  
484 functional recovery. Moreover, synaptic and vascular repair were disrupted in mice with  
485 deficient cytogenesis. SVZ-derived cells produced trophic factors, most notably VEGF. Loss-of-  
486 function experiments demonstrated that VEGF produced by SVZ-derived cells is crucial for  
487 effective repair and recovery. Finally, gain-of-function experiments showed that replacement of  
488 VEGF was sufficient to enhance recovery in mice lacking cytogenesis. We conclude that trophic  
489 support from SVZ-derived cells drives neural repair and functional recovery after stroke. Thus,  
490 newborn cells formed in response to injury enable recovery by acting as a unique source of  
491 trophic cues that instruct neural repair.

492           With lineage tracing of adult neural stem cells and extensive phenotyping, we identified  
493 undifferentiated precursors as the largest subpopulation of SVZ-derived cells after stroke.  
494 Undifferentiated neural precursor cells may be better suited than differentiated neural cell types  
495 to facilitate neural repair. In culture, neural precursors secrete factors that facilitate vessel  
496 formation and neuronal outgrowth (Kirby et al., 2015; Roitbak et al., 2011; Rosenstein et al.,  
497 2003). In addition, transplantation of neural stem cells enhances repair and recovery in models of  
498 stroke without differentiation of transplanted cells (Andres et al., 2011; Bacigaluppi et al., 2016;  
499 Horie et al., 2011; Llorente et al., 2021; Roitbak et al., 2011). Collectively, these studies

500 illustrate the reparative abilities of undifferentiated precursors and suggest that post-stroke  
501 cytogenesis facilitates neural repair without substantial cell replacement.

502 Further work is needed to understand how the fate of individual cells is decided among  
503 the total population of newborn cells arising from the SVZ. Principles of neural development  
504 may apply to cell fate decisions during post-injury cytogenesis in adulthood. For example, the  
505 transcription factor NFIA controls gliogenesis during development (Deneen et al., 2006), and is  
506 also necessary for SVZ astrogenesis after stroke (Laug et al., 2019). In addition, NFIA inhibits  
507 neurogenesis via Notch effectors (David-Bercholz et al., 2021; Deneen et al., 2006).  
508 Accordingly, interfering with Notch signalling in neural stem cells biases SVZ progeny towards  
509 a neuronal fate and away from an astrocytic fate after stroke (Benner et al., 2013). Additional  
510 work will be needed to clarify the mechanisms that dictate phenotypes of SVZ cells responding  
511 to stroke, and whether different cell types have distinct reparative functions.

512 Our finding that aging reduces SVZ cytogenesis could be translationally relevant given  
513 that stroke incidence increases with age (Kissela et al., 2012). We observed the loss of stroke-  
514 induced SVZ proliferation and precursor cell pool expansion in aged mice, which suggests  
515 deficient activation of neural precursor cells with aging. Inflammatory signals have been  
516 implicated in controlling quiescence/activation of precursors. Chronic inflammatory signals,  
517 including interferons, promote stem cell quiescence in aging (Kalamakis et al., 2019). By  
518 contrast, acute interferon signaling after stroke stimulates precursor activation (Belenguer et al.,  
519 2021; Llorens-Bobadilla et al., 2015). Therefore, inflammatory signaling pathways may be a  
520 target to restore cytogenesis in aged animals. We also observed a reduction in the number of  
521 cells localized in peri-infarct regions in aged mice that was disproportionate relative to the

522     diminishment of SVZ cytogenesis. Thus, there may also be an age-dependent reduction in either  
523     the migratory ability of SVZ cells or the expression of migratory cues at the site of injury.

524             SVZ-derived cells interacted closely with peri-infarct blood vessels and produced trophic  
525     factors to facilitate their growth after stroke. The ectopic migration of cells from the SVZ is  
526     caused in part by expression of migratory cues in peri-infarct vasculature after stroke (Ohab et  
527     al., 2006; Thored et al., 2007). This may be an adaptive response to attract precursors that  
528     facilitate tissue growth and repair. Similar processes are mirrored in at least two cases during  
529     development. First, neuroepithelial cells produce VEGF to stimulate initial embryonic brain  
530     angiogenesis (Breier et al., 1992; Raab et al., 2004). Second, endothelial cues drive  
531     oligodendrocyte precursor cell attachment and migration along vessels in the embryonic nervous  
532     system (Tsai et al., 2016), and oligodendrocyte precursor-derived HIF-dependent factors,  
533     including VEGF, subsequently drive early postnatal angiogenesis (Yuen et al., 2014; Zhang et  
534     al., 2020). The ectopic migration of reparative SVZ cells towards injury may represent a reuse of  
535     tissue growth mechanisms from development.

536             We have demonstrated that the SVZ cytogenic response to stroke primarily produces  
537     undifferentiated precursors that localize to peri-infarct regions – the site of neural repair. SVZ-  
538     derived cells produce VEGF that is critical for effective vascular and synaptic plasticity, and  
539     ultimately behavioral recovery. Thus, our findings position SVZ cytogenesis as a mechanism that  
540     promotes recovery via trophic support rather than cell replacement. These findings provide  
541     insight into a fundamental brain repair process and may be relevant for informing treatment  
542     strategies.

## 543 **Materials and Methods**

### 544 *Subjects and experimental design*

545 Young adult (3-6 months) and aged (12-16 months) mice of both sexes were used. All  
546 mice were on a predominantly C57BL/6 background. Transgenic strains were Rosa-CAG-LSL-  
547 tdTomato (Ai14, JAX #007914), Nestin-CreER (JAX #016261), ASCL1-CreER (JAX #012882),  
548 Rosa-CAG-LSL-Sun1-sfGFP (JAX #021039), GFAP-TK (JAX #005698), Thy1-GFP M-line  
549 (JAX #007788), floxed Vegfa (Genentech) (Gerber et al., 1999) (Supplemental Table 1). Mice  
550 were bred locally. Animals were housed 2-5 per cage with free access to food and water, except  
551 during periods of restricted feeding for behavioral training and assessment. Animals were  
552 randomized to groups except when group assignment was dependent on genotype.  
553 Experimentation and analysis were done blinded to group allocation. Experiments consisted of 1-  
554 5 cohorts of animals. Sample sizes were based on past work using similar methods (Benner et al.,  
555 2013; Brown et al., 2007; Clark et al., 2019; Williamson et al., 2021, 2020).

556

### 557 *Drug administration*

558 100 mg/kg of 20 mg/mL tamoxifen dissolved in corn oil was given (i.p.) daily for 5 consecutive  
559 days. 100 mg/kg of 10 mg/mL BrdU dissolved in saline was given (i.p.) once or twice per day  
560 for 2 or 6 consecutive days. Ganciclovir dissolved in saline was delivered continuously for 14  
561 days via subcutaneous osmotic pumps (Azlet) at a rate of 6.25  $\mu$ g/hr. In some experiments, a  
562 second course of ganciclovir was given beginning two weeks after stroke to maintain stem cell  
563 ablation.

564

565 *Cranial window implantation*

566           Chronic glass cranial windows were placed over forelimb motor cortex (Clark et al.,  
567 2019; Williamson et al., 2021, 2020). Isoflurane (3% induction, 1-2% maintenance) in oxygen  
568 was used for anesthesia. Circular craniotomies (~4.5 mm diameter) were made 1.5 mm lateral  
569 from Bregma. 4 mm glass windows (Warner Instruments) were secured in place with  
570 cyanoacrylate, and exposed skull was covered with dental cement. Carprofen (5 mg/kg, i.p.) was  
571 given daily for 7 days to minimize inflammation.

572

573 *Ischemic stroke*

574           To model stroke, unilateral photothrombotic lesions were induced in the forelimb region  
575 of motor cortex (Tennant et al., 2011; Williamson et al., 2021). Isoflurane (3% induction, 1-2%  
576 maintenance) in oxygen was used for anesthesia. Body temperature was maintained with a heated  
577 pad for the duration of anesthesia. Stroke was induced through the intact skull by making a scalp  
578 incision, administering rose bengal (0.15 mL, 15 mg/mL, i.p.), and illuminating the skull 2 mm  
579 lateral from Bregma with a surgical lamp (Schott KL 200) for 15 minutes through a 3 mm  
580 aperture. For animals with cranial windows, penetrating arterioles supplying motor cortex were  
581 identified by live speckle contrast imaging, and subsequently targeted with a 20 mW 532 nm  
582 laser for 15 minutes after administering rose Bengal (0.2 mL, 15 mg/mL, i.p.) (Williamson et al.,  
583 2020). Sham stroke procedures involved omitting either illumination or rose bengal.

584

585 *Virus injections*

586 Cortical layer V was targeted for virus injections with a Drummond Nanoject II  
587 microinjector through a pulled pipette. Injections were made 0.7 mm below the pial surface at  
588 three locations relative to Bregma: 2 mm anterior, 2 mm lateral; 0.5 mm anterior, 3.2 mm lateral;  
589 and 1 mm posterior, 2.8 mm lateral. 230 nL was injected per site at a rate of 46 nL/min. The  
590 pipette was left in place for 2 minutes after the final injection at each site before it was slowly  
591 removed. See Supplemental Table 1 for details on viruses.

592

593 *2-photon imaging of dendritic spines*

594 Mice were anesthetized with isoflurane (3% induction, ~1.5% maintenance) in oxygen  
595 and head-fixed to minimize breathing artifacts. Imaging was done with a Prairie Ultima 2-photon  
596 microscope with a Ti:Sapphire laser (MaiTai, Spectra Physics) tuned to 870 nm. Image stacks  
597 were acquired with 512 x 512 pixel resolution and 0.7  $\mu\text{m}$  z step size using a water-immersion  
598 20 $\times$ /1.0 (Olympus) objective. 4x magnification yielded a 117.2  $\mu\text{m}$  x 117.2  $\mu\text{m}$  field of view.

599 Imaging was done weekly, including two pre-stroke and four post-stroke imaging  
600 sessions. During pre-stroke imaging, typically 6-10 regions of unobstructed dendrites were  
601 imaged to a depth of ~150  $\mu\text{m}$ . Regions were selected based on a predicted proximity of <1 mm  
602 from the infarct. After stroke, the infarct border was identified from blood flow maps and loss of  
603 GFP fluorescence (Supplemental Figure 4). Regions within 700  $\mu\text{m}$  of the infarct border were re-  
604 imaged at subsequent time points in order to track spine dynamics during recovery. In some  
605 animals, additional imaging regions were added after stroke. Time lapse images of dendrites >30  
606  $\mu\text{m}$  in length with clearly visible spines were analyzed to quantify spine formation and



607 elimination, and persistence of newly formed spines (Clark et al., 2019; Joy et al., 2019; Tennant  
608 et al., 2017).

609

### 610 *Blood flow imaging*

611 Blood flow was imaged through cranial windows with multi-exposure speckle imaging, a  
612 label-free, quantitative, optical method (Clark et al., 2019; Williamson et al., 2021, 2020).  
613 Anesthetic level was consistent across all imaging sessions (1.25% isoflurane in oxygen). Two  
614 pre-stroke images were collected to establish baseline blood flow. Post-stroke images were  
615 collected on days 2, 5, 14, and 28. Each imaging session lasted <10 mins. Blood flow was  
616 measured in parenchymal regions and tracked over time as before (Williamson et al., 2021).

617

### 618 *Behavioral testing*

619 Skilled forelimb use was assessed with the single seed reaching task, which is highly  
620 sensitive to deficits caused by motor cortical damage and is translationally relevant (Clark et al.,  
621 2019; Klein et al., 2012; van Lieshout et al., 2021; Williamson et al., 2020). Animals were food  
622 restricted to ~90% free feeding weight to encourage reaching. First, animals were shaped on the  
623 task and the preferred paw for reaching was determined over 2-5 days. Training was done over  
624 15 sessions, once per day, five days per week. Each session consisted of 30 trials. For each trial,  
625 animals were allowed up to two reach attempts. A successful reach was defined as the animal  
626 grasping the seed and bringing it to its mouth. Failure was defined as missing the seed, knocking  
627 it out of the well, or releasing it before it was brought to the animal's mouth. Baseline

628 performance was defined as the mean success rate per trial over the last three training sessions.  
629 Inclusion criteria was a minimum baseline success rate of 30%. 1 mouse (GFAP-TK+GCV) from  
630 the experiment in Figure 2, 8 mice (n = 7 control, n = 1 GFAP-TK+GCV) from the experiment in  
631 Figure 3, and 2 mice (n = 1 AAV-eGFP, n = 1 AAV-VEGF-eGFP) from the experiment in  
632 Supplemental Figure 7 failed to meet this threshold and were excluded. Test sessions were done  
633 on days 3, 7, 14, 21, and 28 post-stroke.

634

### 635 *Histology and image analysis*

636 Mice were euthanized by overdosed with a pentobarbital/phenytoin solution followed by  
637 perfusion with 0.1M phosphate buffer and 4% paraformaldehyde in phosphate buffer. Brains  
638 were postfixed overnight at 4°C. 35 µm coronal sections were collected with a vibratome  
639 (VT1000S, Leica). To label vasculature, mice were retro-orbitally injected with 0.1 mL of  
640 Dylight 594- or 649-conjugated tomato lectin 5 minutes prior to perfusion (Williamson et al.,  
641 2021, 2020). To examine vascular permeability, mice were retro-orbitally injected with 0.1 mL  
642 of 50 mg/mL FITC-conjugated albumin 2 hours prior to perfusion.

643 To create lesion reconstructions and quantify lesion volume, one set of every fifth section  
644 was Nissl stained. Lesions were reconstructed as previously described (Kim et al., 2018). Lesion  
645 volume was calculated using Cavalieri's method as the difference in volume between uninjured  
646 and injured cortex.

647 Immunohistochemical staining was done by washing tissue in phosphate buffered saline  
648 (PBS), blocking with 10% donkey serum in PBS with 0.25% Triton for 60 minutes, incubating  
649 with primary antibodies overnight (antibodies and dilutions are reported in Supplemental Table

650 1), washing in PBS, incubating with species appropriate 405-, 488-, 594, or 647-conjugated  
651 secondary antibodies, and washing a final time in PBS. Tissue was pretreated with 2 N HCl (30  
652 mins) followed by 0.1 M boric acid (10 mins) when staining for BrdU.

653 Confocal images with 1-2  $\mu\text{m}$  Z-step size were collected with a Leica TCS SP5  
654 microscope. 20 $\times$ /0.7 NA and 40 $\times$ /1.0NA objectives were used. Acquisition settings were  
655 consistent between samples. Typically, 3 sections were imaged per region of interest per mouse.

656 FIJI was used for image analysis. Area fraction and fluorescence intensity were  
657 quantified as before (Williamson et al., 2021). The optical disector method was used to count cell  
658 density. Cell density was calculated by number of cells / (frame area  $\times$  section thickness).

659

#### 660 *Statistics*

661 Data are expressed as mean  $\pm$  S.E.M. Measurements from individual animals are shown on plots  
662 as datapoints where possible. Data were analyzed with GraphPad Prism version 9.3. Independent  
663 samples were compared with two-tailed t tests. Variance was assessed with F tests, and Welch's  
664 corrected t tests were used in cases where variance was significantly different. One- and two-way  
665 ANOVAs, mixed-effects analyses, and linear regressions were used as noted in the text. Post hoc  
666 tests were used following significant ANOVA as noted in the text. Details on the statistical tests  
667 used for each experiment are located in the Results and figure legends. Alpha was set at  $P < 0.05$ .

668

#### 669 *Study approval*

670 Animal use was in accordance with a protocol approved by the Institutional Animal Care and  
671 Use Committee at the University of Texas at Austin.

672 **Author contributions**

673 Conceptualization: M.R.W.; Methodology: M.R.W., T.A.J., and M.R.D.; Investigation and  
674 analysis: M.R.W., S.P.L., R.L.F., N.A.D., and J.L.R.; Writing – Original Draft: M.R.W.; Writing  
675 – Review & Editing: all authors; Supervision: T.A.J. and M.R.D.; Funding Acquisition: A.K.D.,  
676 M.R.D., and T.A.J.

677

678 **Acknowledgments**

679 This work was supported by Canadian Institutes of Health Research Doctoral Award DFS-  
680 157838 to M.R.W., National Institutes of Health R01 NS108484 and R01 EB011556 to A.K.D.,  
681 R01 MH102595 and R01 MH117426 to M.R.D., and R37 NS056839 to T.A.J.. This work was  
682 performed with the support of the Mouse Genetic Engineering Facility (RRID:SCR 021927), a  
683 core facility within the Center for Biomedical Research Support at the University of Texas at  
684 Austin.

685

686 **Competing Interests**

687 None.

688 **References**

- 689 Andres RH, Horie N, Slikker W, Keren-gill H, Zhan K, Sun G, Manley NC, Pereira MP, Sheikh  
690 LA, Mcmillan EL, Schaar BT, Svendsen CN, Bliss TM, Steinberg GK. 2011. Human neural  
691 stem cells enhance structural plasticity and axonal transport in the ischaemic brain. *Brain*  
692 **134**:1777–1780. doi:10.1093/brain/awr094
- 693 Arvidsson A, Collin T, Kirik D, Kokaia Z, Lindvall O. 2002. Neuronal replacement from  
694 endogenous precursors in the adult brain after stroke. *Nat Med* **8**:963–970.  
695 doi:10.1038/nm747
- 696 Bacigaluppi M, Pluchino S, Jametti LP, Kilic E, Salani G, Brambilla E, West MJ, Comi G. 2009.  
697 Delayed post-ischaemic neuroprotection following systemic neural stem cell transplantation  
698 involves multiple mechanisms. *Brain* **132**:2239–2251. doi:10.1093/brain/awp174
- 699 Bacigaluppi M, Russo GL, Peruzzotti-Jametti L, Rossi S, Sandrone S, Butti E, Ceglia R De,  
700 Bergamaschi A, Motta C, Gallizioli M, Studer V, Colombo E, Farina C, Comi G, Politi LS,  
701 Muzio L, Villani C, Invernizzi RW, Hermann DM, Centonze D, Martino G. 2016. Neural  
702 Stem Cell Transplantation Induces Stroke Recovery by Upregulating Glutamate Transporter  
703 GLT-1 in Astrocytes. *J Neurosci* **36**:10529–10544. doi:10.1523/JNEUROSCI.1643-16.2016
- 704 Belenguer G, Duarte-Abadia P, Jordan-Pla A, Domingo-Muelas A, Blasco-Chamarro L, Ferron  
705 SR, Morante-Redolat JM, Farinas I. 2021. Adult Neural Stem Cells Are Alerted by  
706 Systemic Inflammation through TNF- $\alpha$  Receptor Signaling. *Cell Stem Cell* **28**:285–299.  
707 doi:10.1016/j.stem.2020.10.016
- 708 Benner EJ, Luciano D, Jo R, Abdi K, Paez-Gonzalez P, Sheng H, Warner D, Liu C, Eroglu C,



- 709 Kuo CT. 2013. Post-injury protective astrogenesis from SVZ niche is controlled by Notch  
710 modulator Thbs4. *Nature* **497**:369–373. doi:10.1038/nature12069.Post-injury
- 711 Bouab M, Paliouras GN, Aumont A, Berard-Forest K, Fernandes KJL. 2011. Aging of the  
712 Subventricular Zone Neural Stem Cell Niche: Evidence for Quiescence-Associated Changes  
713 Between Early and Mid-Adulthood. *Neuroscience* **173**:135–149.  
714 doi:10.1016/j.neuroscience.2010.11.032
- 715 Bovetti S, Hsieh Y, Bovolín P, Perroteau I, Kazunori T, Puche AC. 2007. Blood Vessels Form a  
716 Scaffold for Neuroblast Migration in the Adult Olfactory Bulb. *J Neurosci* **27**:5976–5980.  
717 doi:10.1523/JNEUROSCI.0678-07.2007
- 718 Breier G, Albrecht U, Sterrer S, Risau W. 1992. Expression of vascular endothelial growth factor  
719 during embryonic angiogenesis and endothelial cell differentiation. *Development* **114**:521–  
720 532. doi:10.1242/dev.114.2.521
- 721 Brown CE, Li P, Boyd JD, Delaney KR, Murphy TH. 2007. Extensive Turnover of Dendritic  
722 Spines and Vascular Remodeling in Cortical Tissues Recovering from Stroke. *J Neurosci*  
723 **27**:4101–4109. doi:10.1523/JNEUROSCI.4295-06.2007
- 724 Clark TA, Sullender C, Jacob D, Zuo Y, Dunn AK, Jones TA. 2019. Rehabilitative Training  
725 Interacts with Ischemia-Instigated Spine Dynamics to Promote a Lasting Population of New  
726 Synapses in Peri-Infarct Motor Cortex. *J Neurosci* **39**:8471–8483.  
727 doi:10.1523/JNEUROSCI.1141-19.2019
- 728 Codega P, Silva-vargas V, Paul A, Maldonado-soto AR, Deleo AM, Pastrana E. 2014.  
729 Prospective Identification and Purification of Quiescent Adult Neural Stem Cells from

- 730 Their In Vivo Niche. *Neuron* **82**:545–559. doi:10.1016/j.neuron.2014.02.039
- 731 David-Berholz J, Kuo CT, Deneen B. 2021. Astrocyte and Oligodendrocyte Responses From  
732 the Subventricular Zone After Injury. *Front Cell Neurosci* **15**:797553.  
733 doi:10.3389/fncel.2021.797553
- 734 Deneen B, Ho R, Lukaszewicz A, Hochstim CJ, Gronostajski RM, Anderson DJ. 2006. The  
735 Transcription Factor NFIA Controls the Onset of Gliogenesis in the Developing Spinal  
736 Cord. *Neuron* **52**:953–968. doi:10.1016/j.neuron.2006.11.019
- 737 Doetsch F, Caille I, Lim DA, Garcia JM, Alvarez-buylla A. 1999. Subventricular Zone Astrocytes  
738 Are Neural Stem Cells in the Adult Mammalian Brain. *Cell* **97**:703–716.
- 739 Drago D, Cossetti C, Iraci N, Gaude E, Musco G, Bachi A, Pluchino S. 2013. The stem cell  
740 secretome and its role in brain repair. *Biochimie* **95**:2271–2285.  
741 doi:10.1016/j.biochi.2013.06.020
- 742 Faiz M, Sachewsky N, Gascon S, Bang KWA, Morshead CM, Nagy A. 2015. Adult Neural Stem  
743 Cells from the Subventricular Zone Give Rise to Reactive Astrocytes in the Cortex after  
744 Stroke. *Cell Stem Cell* **17**:624–634. doi:10.1016/j.stem.2015.08.002
- 745 Garcia ADR, Doan NB, Imura T, Bush TG, Sofroniew M V. 2004. GFAP-expressing progenitors  
746 are the principal source of constitutive neurogenesis in adult mouse forebrain. *Nat Neurosci*  
747 **7**:1233–1241. doi:10.1038/nn1340
- 748 Gerber HP, Hillan KJ, Ryan AM, Kowalski J, Keller GA, Rangell L, Wright BD, Radtke F,  
749 Aguet M, Ferrara N. 1999. VEGF is required for growth and survival in neonatal mice.  
750 *Development* **126**:1149–1159.

- 751 Götz M, Sirko S, Beckers J, Irmeler M. 2015. Reactive astrocytes as neural stem or progenitor  
752 cells: In vivo lineage, In vitro potential, and Genome-wide expression analysis. *Glia*  
753 **63**:1452–1468. doi:10.1002/glia.22850
- 754 He F, Sullender C, Zhu H, Williamson MR, Li X, Zhao Z, Jones TA, Xie C, Dunn AK, Luan L.  
755 2020. Multimodal mapping of neural activity and cerebral blood flow reveals long-lasting  
756 neurovascular dissociations after small-scale strokes. *Sci Adv* **6**:eaba1933.  
757 doi:10.1101/2020.03.04.977322
- 758 Horie N, Pereira MP, Niizuma K, Sun G, Keren-Gill H, Encarnacion A, Shamloo M, Hamilton  
759 SA, Jiang K, Huhn S, Palmer TD, Bliss TM, Steinberg GK. 2011. Transplanted stem cell-  
760 secreted vascular endothelial growth factor effects poststroke recovery, inflammation, and  
761 vascular repair. *Stem Cells* **29**:274–285. doi:10.1002/stem.584
- 762 Jin K, Minami M, Xie L, Sun Y, Mao XO, Wang Y, Simon RP, Greenberg DA. 2004. Ischemia-  
763 induced neurogenesis is preserved but reduced in the aged rodent brain. *Aging Cell* **3**:373–  
764 377. doi:10.1111/j.1474-9728.2004.00131.x
- 765 Joy MT, Ben Assayag E, Shabashov-Stone D, Liraz-Zaltsman S, Mazzitelli J, Arenas M,  
766 Abduljawad N, Kliper E, Korczyn AD, Thareja NS, Kesner EL, Zhou M, Huang S, Silva  
767 TK, Katz N, Bornstein NM, Silva AJ, Shohami E, Carmichael ST. 2019. CCR5 Is a  
768 Therapeutic Target for Recovery after Stroke and Traumatic Brain Injury. *Cell* **176**:1143-  
769 1157.e13. doi:10.1016/j.cell.2019.01.044
- 770 Kalamakis G, Brune D, Ravichandran S, Bolz J, Fan W, Ziebell F, Stiehl T, Catala-Martinez F,  
771 Kupke J, Zhao S, Llorens-Bobadilla E, Bauer K, Limpert S, Berger B, Christen U,  
772 Schmezer P, Mallm JP, Berninger B, Anders S, del Sol A, Marciniak-Czochra A, Martin-

- 773 Villalba A. 2019. Quiescence Modulates Stem Cell Maintenance and Regenerative Capacity  
774 in the Aging Brain. *Cell* **176**:1407–1419. doi:10.1016/j.cell.2019.01.040
- 775 Kannangara TS, Carter A, Xue Y, Dhaliwal JS, Béique J-C, Lagace DC. 2018. Excitable Adult-  
776 Generated GABAergic Neurons Acquire Functional Innervation in the Cortex after Stroke.  
777 *Stem Cell Reports* **11**:1327–1336. doi:10.1016/j.stemcr.2018.10.011
- 778 Kim SY, Hsu JE, Husbands LC, Kleim JA, Jones TA. 2018. Coordinated Plasticity of Synapses  
779 and Astrocytes Underlies Practice-Driven Functional Vicariation in Peri-Infarct Motor  
780 Cortex. *J Neurosci* **38**:93–107. doi:10.1523/JNEUROSCI.1295-17.2017
- 781 Kirby ED, Kuwahara AA, Messer RL, Wyss-Coray T. 2015. Adult hippocampal neural stem and  
782 progenitor cells regulate the neurogenic niche by secreting VEGF. *Proc Natl Acad Sci*  
783 **112**:4128–4133. doi:10.1073/pnas.1422448112
- 784 Kissela BM, Khoury JC, Alwell K, Moomaw CJ, Woo D, Adeoye O, Flaherty ML, Ferioli S, De  
785 Los Rios La Rosa F, Broderick JP, Kleindorfer DO. 2012. Age at stroke: Temporal trends in  
786 stroke incidence in a large, biracial population. *Neurology* **79**:1781–1787.
- 787 Klein A, Sacrey LAR, Whishaw IQ, Dunnett SB. 2012. The use of rodent skilled reaching as a  
788 translational model for investigating brain damage and disease. *Neurosci Biobehav Rev*  
789 **36**:1030–1042. doi:10.1016/j.neubiorev.2011.12.010
- 790 Lagace DC. 2012. Does the endogenous neurogenic response alter behavioral recovery following  
791 stroke? *Behav Brain Res* **227**:426–432. doi:10.1016/j.bbr.2011.08.045
- 792 Latke M, Goldstone R, Ellis JK, Boeing S, Jurado-Arjona J, Marichal N, MacRae JI, Berninger  
793 B, Guillemot F. 2021. Extensive transcriptional and chromatin changes underlie astrocyte

- 794 maturation in vivo and in culture. *Nat Commun* **12**. doi:10.1038/s41467-021-24624-5
- 795 Laug D, Huang TW, Bosquez Huerta NA, Huang AYS, Sardar D, Ortiz-Guzman J, Carlson JC,  
796 Arenkiel BR, Kuo CT, Mohila CA, Glasgow SM, Lee HK, Deneen B. 2019. Nuclear factor  
797 I-A regulates diverse reactive astrocyte responses after CNS injury. *J Clin Invest* **129**:4408–  
798 4418. doi:10.1172/JCI127492
- 799 Li L, Candelario KM, Thomas K, Wang R, Wright K, Messier A, Cunningham LA. 2014.  
800 Hypoxia inducible factor-1 $\alpha$  (HIF-1 $\alpha$ ) is required for neural stem cell maintenance and  
801 vascular stability in the adult mouse SVZ. *J Neurosci* **34**:16713–16719.  
802 doi:10.1523/JNEUROSCI.4590-13.2014
- 803 Li L, Harms KM, Ventura PB, Lagace DC, Eisch AJ, Cunningham LA. 2010. Focal Cerebral  
804 Ischemia Induces a Multilineage Cytogenic Response from Adult Subventricular Zone that  
805 is Predominantly Gliogenic. *Glia* **58**:1610–1619. doi:10.1002/glia.21033
- 806 Liang H, Zhao H, Gleichman A, Machnicki M, Telang S, Tang S, Rshtouni M, Ruddell J,  
807 Thomas Carmichael S. 2019. Region-specific and activity-dependent regulation of SVZ  
808 neurogenesis and recovery after stroke. *Proc Natl Acad Sci U S A* **116**:13621–13630.  
809 doi:10.1073/pnas.1811825116
- 810 Lin C-CJ, Yu K, Hatcher A, Huang T, Lee HK, Carlson J, Weston MC, Chen F, Zhang Y, Zhu  
811 W, Mohila CA, Ahmed N, Patel AJ, Arenkiel BR, Noebels JL, Creighton CJ, Deneen B.  
812 2017. Identification of diverse astrocyte populations and their malignant analogs. *Nat*  
813 *Neurosci* **20**:396–405. doi:10.1038/nn.4493
- 814 Llorens-Bobadilla E, Zhao S, Baser A, Saiz-Castro G, Martin-Villalba A. 2015. Single-Cell

- 815 Transcriptomics Reveals a Population of Dormant Neural Stem Cells that Become  
816 Activated upon Brain Injury Article Single-Cell Transcriptomics Reveals a Population of  
817 Dormant Neural Stem Cells that Become Activated upon Brain Injury. *Cell Stem Cell*  
818 **17**:329–340. doi:10.1016/j.stem.2015.07.002
- 819 Llorente IL, Xie Y, Mazzitelli JA, Hatanaka EA, Cinkornpumin J, Miller DR, Lin Y, Lowry WE,  
820 Carmichael ST. 2021. Patient-derived glial enriched progenitors repair functional deficits  
821 due to white matter stroke and vascular dementia in rodents. *Sci Transl Med* **13**:eaaz6747.
- 822 Luo J, Daniels SB, Lenington JB, Notti RQ, Conover JC. 2006. The aging neurogenic  
823 subventricular zone. *Aging Cell* 139–152. doi:10.1111/j.1474-9726.2006.00197.x
- 824 Magnusson JP, Göritz C, Tatarishvili J, Dias DO, Smith EMK, Lindvall O, Kokaia Z, Frisén J.  
825 2014. A latent neurogenic program in astrocytes regulated by Notch signaling in the mouse.  
826 *Science (80- )* **346**:237–241. doi:10.1126/science.346.6206.237
- 827 Martino G, Pluchino S. 2006. The therapeutic potential of neural stem cells. *Nat Rev Neurosci*  
828 **7**:395–406.
- 829 Mostany R, Chowdhury TG, Johnston DG, Portonovo SA, Carmichael ST, Portera-Cailliau C.  
830 2010. Local hemodynamics dictate long-term dendritic plasticity in peri-infarct cortex. *J*  
831 *Neurosci* **30**:14116–14126. doi:10.1523/JNEUROSCI.3908-10.2010
- 832 Ohab JJ, Fleming S, Blesch A, Carmichael ST. 2006. A neurovascular niche for neurogenesis  
833 after stroke. *J Neurosci* **26**:13007–13016. doi:10.1523/JNEUROSCI.4323-06.2006
- 834 Paolucci S, Antonucci G, Troisi E, Bragoni M, Coiro P, De Angelis D, Pratesi L, Venturiero V,  
835 Grasso MG. 2003. Aging and stroke rehabilitation. a case-comparison study. *Cerebrovasc*



- 836 *Disord* **15**:98–105.
- 837 Parent JM, Vexler ZS, Gong C, Derugin N, Ferriero DM. 2002. Rat Forebrain Neurogenesis and  
838 Striatal Neuron Replacement after Focal Stroke. *Ann Neurol* **52**:802–813.
- 839 Pluchino S, Zanotti L, Rossi B, Brambilla E, Ottoboni L, Salani G, Martinello M, Cattalini A,  
840 Bergami A, Furlan R, Comi G, Constantin G, Martino G. 2005. Neurosphere-derived  
841 multipotent precursors promote neuroprotection by an immunomodulatory mechanism.  
842 *Nature* **436**:266–271. doi:10.1038/nature03889
- 843 Raab S, Beck H, Gaumann A, Yüce A, Gerber HP, Plate K, Hammes H-P, Ferrara N, Breier G.  
844 2004. Impaired brain angiogenesis and neuronal apoptosis induced by conditional  
845 homozygous inactivation of vascular endothelial growth factor. *Thromb Haemost* **91**:595–  
846 605. doi:10.1160/th03-09-0582
- 847 Raponi E, Agenes F, Delphin C, Assard N, Baudier J, Legraverend C, Deloulme J. 2007. S100B  
848 Expression Defines a State in Which GFAP-Expressing Cells Lose Their Neural Stem Cell  
849 Potential and Acquire a More Mature Developmental Stage. *Glia* **177**:165–177.  
850 doi:10.1002/glia
- 851 Robel S, Berninger B, Götz M. 2011. The stem cell potential of glia: Lessons from reactive  
852 gliosis. *Nat Rev Neurosci*. doi:10.1038/nrn2978
- 853 Roitbak T, Li L, Cunningham LA. 2011. Neural Stem/Progenitor Cells Promote Endothelial Cell  
854 Morphogenesis and Protect Endothelial Cells against Ischemia via HIF-1 $\alpha$ -regulated VEGF  
855 Signaling. *J Cereb Blood Flow Metab* **28**:1530–1542. doi:10.1038/jcbfm.2008.38.Neural
- 856 Rosenstein JM, Mani N, Khaibullina A, Krum JM. 2003. Neurotrophic Effects of Vascular

- 857 Endothelial Growth Factor on Organotypic Cortical Explants and Primary Cortical Neurons.  
858 *J Neurosci* **23**:11036–11044. doi:10.1523/jneurosci.23-35-11036.2003
- 859 Sabelström H, Stenudd M, Réu P, Dias DO, Elfineh M, Zdunek S, Damberg P, Göritz C, Frisé  
860 J. 2013. Resident Neural Stem Cells Restrict Tissue Damage and Neuronal Loss After  
861 Spinal Cord Injury in Mice. *Science (80- )* **537**:534–537.
- 862 Sun Y, Logvinova A, Greenberg DA, Sun Y, Jin K, Xie L, Childs J, Mao XO, Logvinova A,  
863 Greenberg DA. 2003. VEGF-induced neuroprotection, neurogenesis, and angiogenesis after  
864 focal cerebral ischemia. *J Clin Invest* **111**:1843–1851.  
865 doi:10.1172/JCI200317977.Introduction
- 866 Swan AA, Clutton JE, Chary PK, Cook SG, Liu GG, Drew MR. 2014. Characterization of the  
867 role of adult neurogenesis in touch-screen discrimination learning. *Hippocampus* **24**:1581–  
868 1591. doi:10.1002/hipo.22337
- 869 Tennant KA, Adkins DL, Donlan NA, Asay AL, Thomas N, Kleim JA, Jones TA. 2011. The  
870 organization of the forelimb representation of the C57BL/6 mouse motor cortex as defined  
871 by intracortical microstimulation and cytoarchitecture. *Cereb Cortex* **21**:865–876.  
872 doi:10.1093/cercor/bhq159
- 873 Tennant KA, Taylor SL, White ER, Brown CE. 2017. Optogenetic rewiring of thalamocortical  
874 circuits to restore function in the stroke injured brain. *Nat Commun* **8**:15879.  
875 doi:10.1038/ncomms15879
- 876 Thored P, Wood J, Arvidsson A, Kokaia Z, Lindvall O. 2007. Long-Term Neuroblast Migration  
877 Along Blood Vessels in an Area With Transient Angiogenesis and Increased

- 878           Vascularization after Stroke. *Stroke* **38**:3032–9. doi:10.1161/STROKEAHA.107.488445
- 879   Tsai HH, Niu J, Munji R, Davalos D, Chang J, Zhang H, Tien AC, Kuo CJ, Chan JR, Daneman  
880           R, Fancy SPJ. 2016. Oligodendrocyte precursors migrate along vasculature in the  
881           developing nervous system. *Science (80- )* **351**:379–384. doi:10.1126/science.aad3839
- 882   van Lieshout ECC, Boonzaier J, Pel AJ, van Heijningen CL, Vink JJ, Visser-Meily JMA, van  
883           Tilborg GAF, Dijkhuizen RM. 2021. Translational Value of Skilled Reaching Assessment  
884           in Clinical and Preclinical Studies on Motor Recovery After Stroke. *Neurorehabil Neural*  
885           *Repair* **35**:457–467. doi:10.1177/15459683211005022
- 886   Williamson MR, Franzen RL, Fuertes CJA, Dunn AK, Drew MR, Jones TA. 2020. A window of  
887           vascular plasticity coupled to behavioral recovery after stroke. *J Neurosci* **40**:7651–7667.  
888           doi:10.1523/jneurosci.1464-20.2020
- 889   Williamson MR, Fuertes CJA, Dunn AK, Drew MR, Jones TA. 2021. Reactive astrocytes  
890           facilitate vascular repair and remodeling after stroke. *Cell Rep* **35**:109048.  
891           doi:10.1016/j.celrep.2021.109048
- 892   Williamson MR, Jones TA, Drew MR. 2019. Functions of subventricular zone neural precursor  
893           cells in stroke recovery. *Behav Brain Res*. doi:10.1016/j.bbr.2019.112209
- 894   Yuen TJ, Silbereis JC, Griveau A, Chang SM, Daneman R, Fancy SPJ, Zahed H, Maltepe E,  
895           Rowitch DH. 2014. Oligodendrocyte-encoded HIF function couples postnatal myelination  
896           and white matter angiogenesis. *Cell* **158**:383–396. doi:10.1016/j.cell.2014.04.052
- 897   Zamboni M, Llorens-Bobadilla E, Magnusson JP, Frisén J. 2020. A Widespread Neurogenic  
898           Potential of Neocortical Astrocytes Is Induced by Injury. *Cell Stem Cell* **27**:605-617.e5.

899           doi:10.1016/j.stem.2020.07.006

900   Zhang S, Kim B, Zhu X, Gui X, Wang Y, Lan Z, Prabhu P, Fond K, Wang A, Guo F. 2020. Glial  
901   type specific regulation of CNS angiogenesis by HIF $\alpha$ -activated different signaling  
902   pathways. *Nat Commun* **11**:2027. doi:10.1038/s41467-020-15656-4

903

904 **Supplemental figures and tables**

905

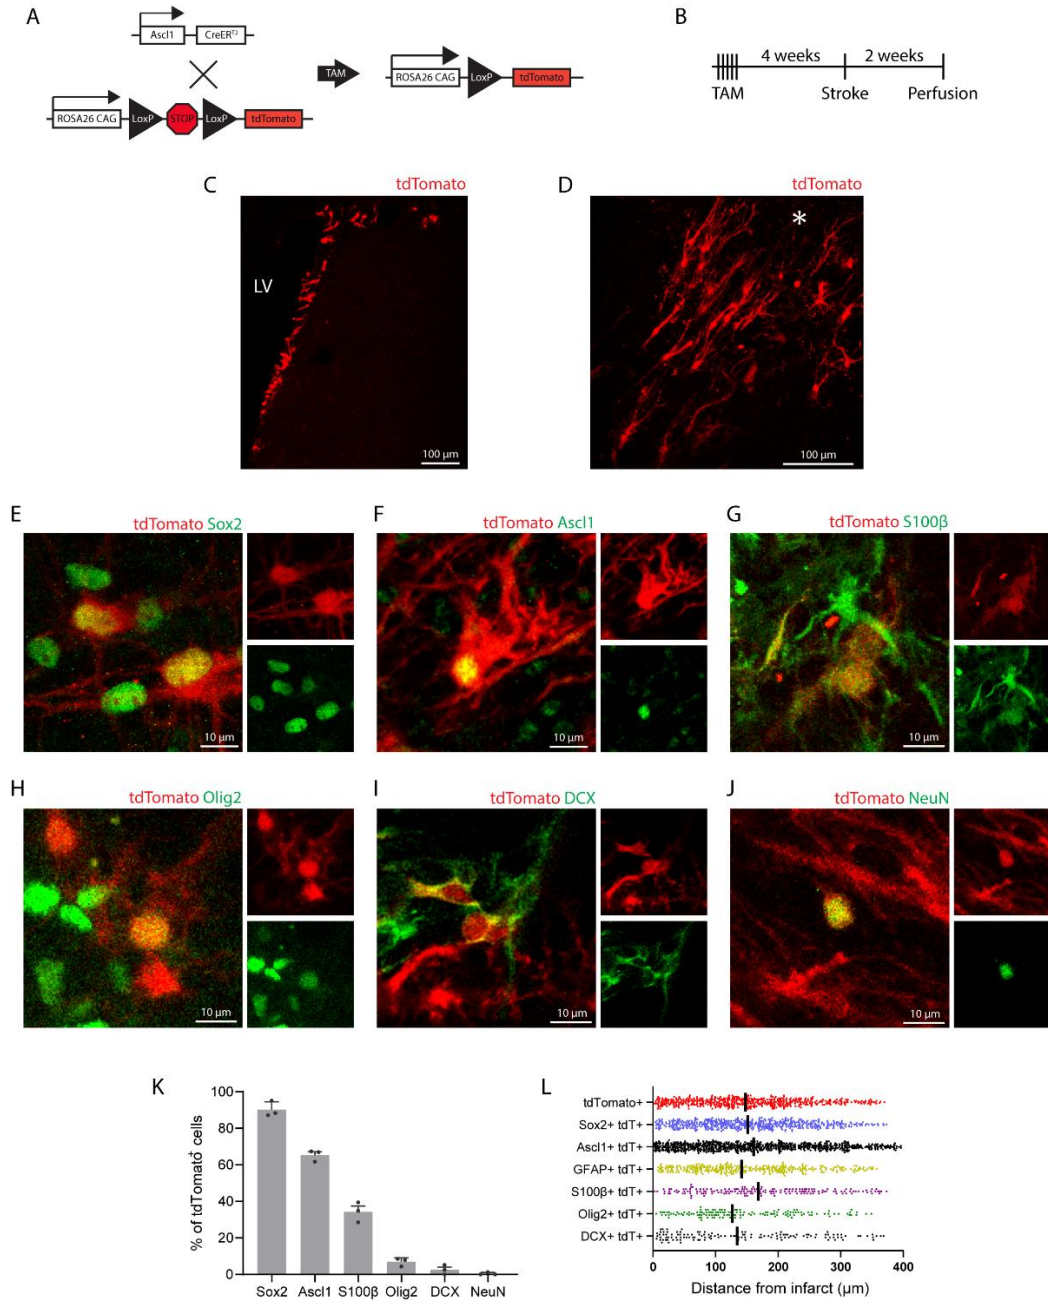

906

907 **Supplemental Figure 1. SVZ-derived cells are predominantly undifferentiated precursors**

908 **and astrocytes.**

909 A) Schematic of genetic lineage tracing system where tamoxifen (TAM) induces indelible  
910 expression of tdTomato in *Ascl1*-expressing neural stem cells, intermediate progenitor cells, and  
911 their progeny. B) Experimental design. C) Image showing tdTomato expression in the SVZ. LV,  
912 lateral ventricle. D) Representative image of tdTomato<sup>+</sup> cells localized to peri-infarct cortex 2  
913 weeks after a cortical stroke (asterisk). E-J) Lineage tracing using *Ascl1*-CreER; Ai14 mice  
914 corroborates the major finding of Figure 1, that SVZ-derived cells in peri-infarct cortex are  
915 predominantly undifferentiated precursors and astrocytes. Representative images illustrating co-  
916 labeling of lineage traced tdTomato<sup>+</sup> cells with differentiation stage-specific markers at two  
917 weeks post-stroke (E) Sox2, F) *Ascl1*, G) S100 $\beta$ , H) Olig2, I) DCX. J) NeuN). K) Quantification  
918 of marker expression by % of tdTomato<sup>+</sup> cells. Data are presented as mean  $\pm$  SEM. L) Spatial  
919 distribution of cells relative to the infarct border by marker expression at 2 weeks post-stroke in  
920 Nestin-CreER; Ai14 mice. Each point indicates a single cell. Vertical lines indicate medians.  
921 There was no clear pattern of spatial organization by cell type. Distance was measured as the  
922 distance to the nearest part of the infarct border within a given section for each cell. Only cells  
923 within 400  $\mu$ m of the infarct border and within cortex were included in this analysis.

924

925



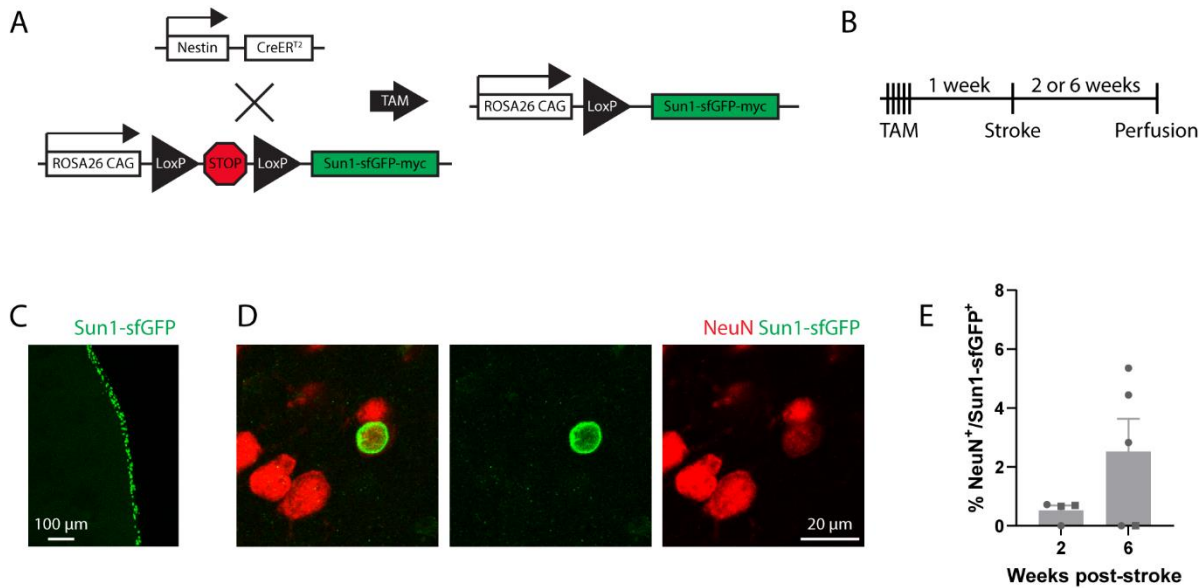

926

927 **Supplemental Figure 2. Few SVZ-derived cells become neurons.**

928 A) Schematic of genetic lineage tracing system where tamoxifen (TAM) induces indelible  
929 expression of a nuclear membrane-bound Sun1-sfGFP in neural stem cells and their progeny. B)  
930 Experimental design. C) Image showing Sun1-sfGFP expression in the SVZ. D) Representative  
931 image of a NeuN<sup>+</sup>Sun1-sfGFP<sup>+</sup> nucleus in peri-infarct cortex. E) Quantification of SVZ-derived  
932 neurons. Data were derived from a combined 1014 nuclei counted across nine mice (n = 4 at two  
933 weeks, n = 5 at six weeks). There was not a significant difference between time points ( $t(4.2) =$   
934 1.79,  $p = 0.145$ , Welch's corrected t test). Data are presented as mean  $\pm$  SEM. Datapoints  
935 representing males are shown as circles; datapoints representing females are shown as squares.

936

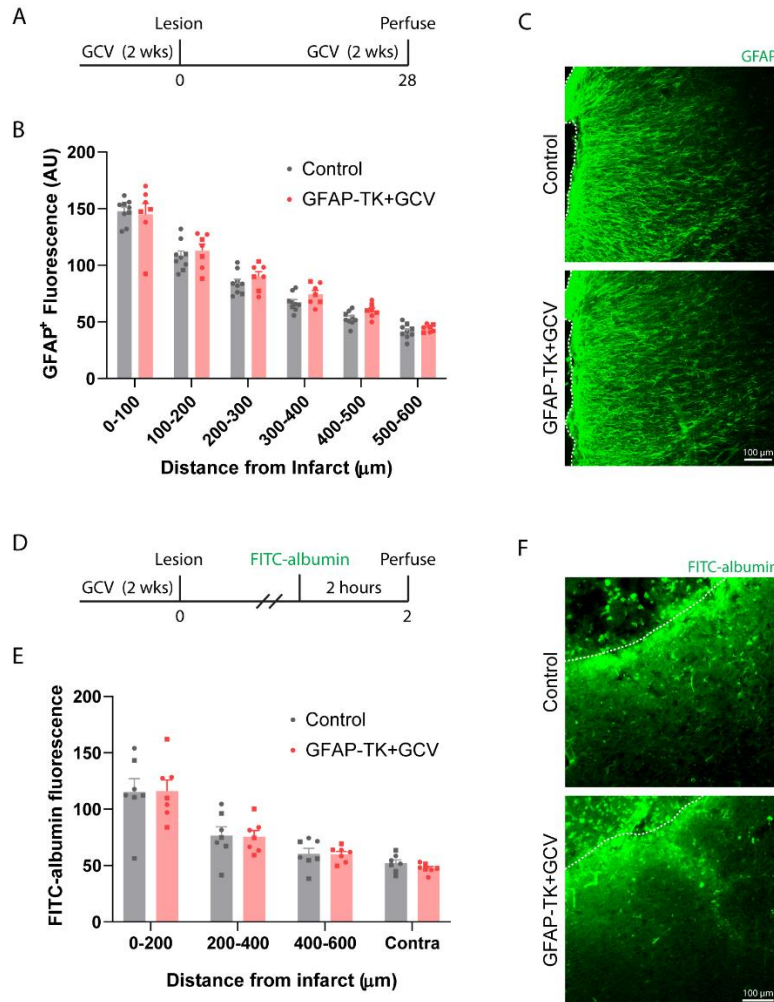

937

938 **Supplemental Figure 3. Neural stem cell ablation does not alter parenchymal astrocyte**  
 939 **reactivity or vascular permeability after stroke.**

940 A) Experimental timeline for examining GFAP fluorescence. Tissue was obtained 28 days post-  
 941 stroke (n = 9 controls (TK<sup>-/-</sup>), n = 7 GFAP-TK<sup>+/-</sup>). To assess parenchymal astrocyte reactivity,  
 942 images were taken in superficial peri-infarct cortex where few SVZ-derived cells localize. B)  
 943 GFAP<sup>+</sup> fluorescence was increased near the lesion, but declined with distance away,  
 944 characteristic of astrocyte reactivity (distance effect  $F(5, 84) = 172.9, p < 0.001$ ). There was no  
 945 significant group effect ( $F(1, 84) = 2.8, p = 0.100$ ). C) Representative images of GFAP  
 946 immunostaining in peri-infarct cortex. Dashed lines indicate the lesion border. D) Experimental

947 design for examining vascular permeability. Two days post-stroke, animals were retro-orbitally  
948 injected with FITC-conjugated albumin 2 hours before perfusion (n = 7 controls (TK<sup>-/-</sup>), n = 7  
949 GFAP-TK<sup>+/-</sup>). E) FITC-albumin fluorescence was greatest near the infarct border and declined  
950 with distance away, consistent with injury-induced vascular permeability (distance effect F(3,  
951 48) = 36.9, p < 0.001). There was no significant effect of group (F(1, 48) = 0.07, p = 0.789). F)  
952 Representative images of FITC-albumin fluorescence in peri-infarct cortex. Dashed lines  
953 indicate the lesion border. Data are presented as mean ± SEM. Datapoints representing males are  
954 shown as circles; datapoints representing females are shown as squares.

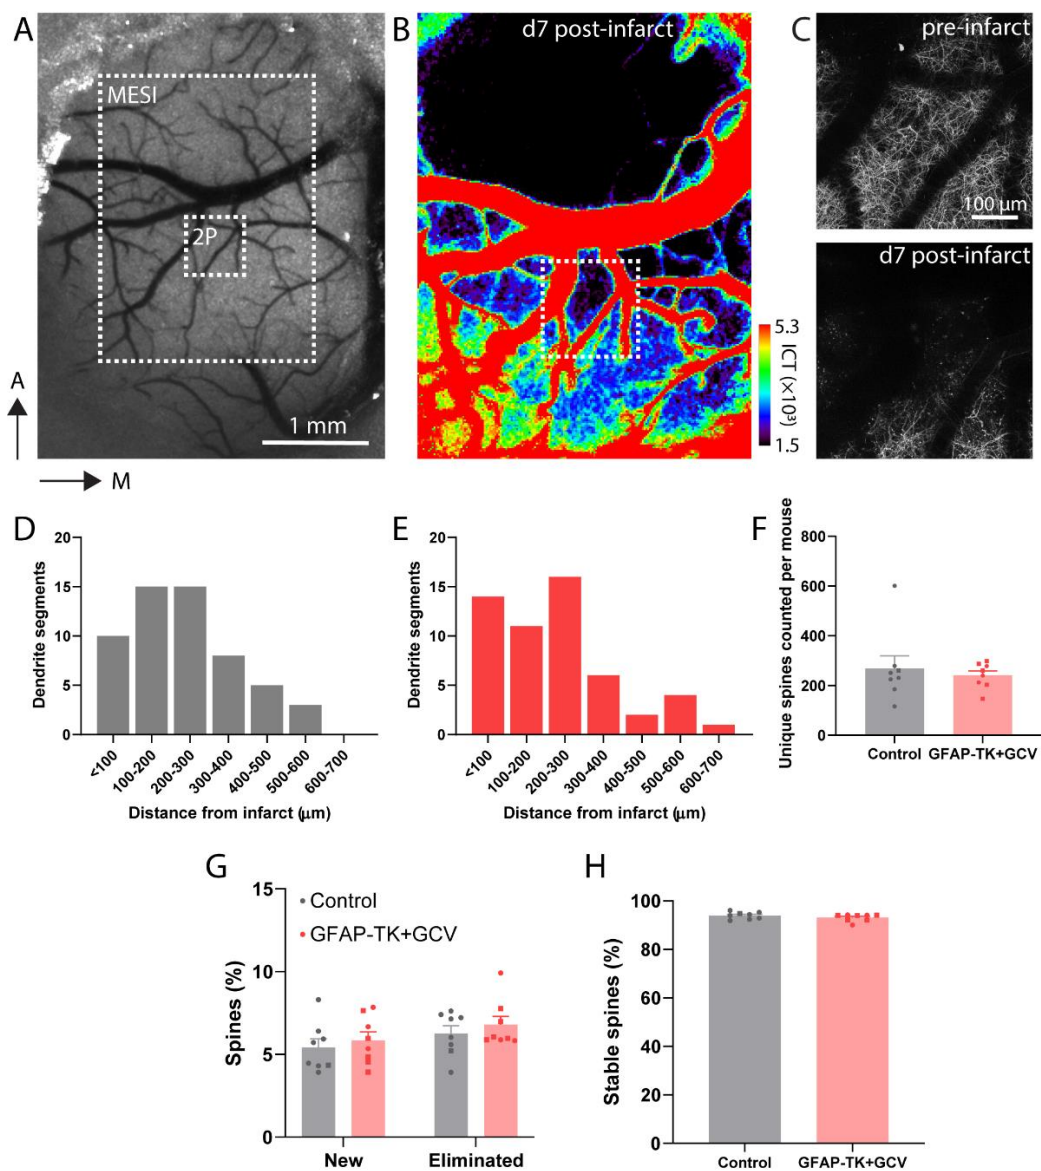

955

956 **Supplemental Figure 4. Additional data 2-photon imaging data.**

957 A) MESI accurately delineates the infarct border. Widefield laser speckle contrast image

958 showing the cortical surface through a cranial window. B) Multi-exposure speckle imaging

959 (MESI) image of blood flow corresponding to the region indicated in panel A. C) Two photon

960 image of GFP-labeled apical dendrites (Thy1-GFP) corresponding to the region indicated in

961 panels A and B. The infarct border revealed by MESI (black region in B) matches the region in

962 which GFP fluorescence is absent. D-E) Distribution of the locations of analyzed dendrite  
963 segments relative to the infarct border for control (D) and GFAP-TK+GCV mice (E) (number of  
964 segments is summed across mice). F) Numbers of unique longitudinally tracked dendritic spines  
965 by group. Each point corresponds to an individual animal. Pre-stroke spine turnover (G) and  
966 stability (H) were not different between groups ( $t(14) \leq 1.1$ ,  $p \geq 0.272$ ). Data are presented as  
967 mean  $\pm$  SEM. Datapoints representing males are shown as circles; datapoints representing  
968 females are shown as squares.

969

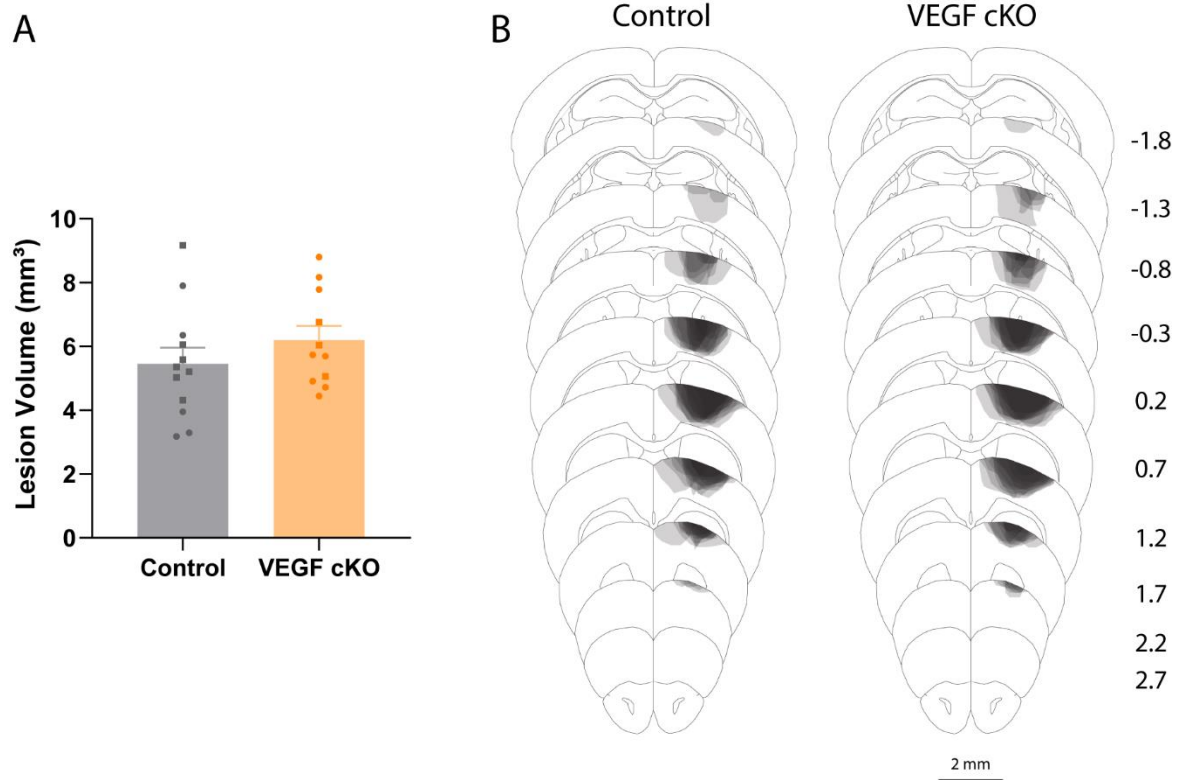

970

971 **Figure S5. VEGF cKO did not affect lesion size or location.**

972 A) Lesion size was not different between groups ( $t(21) = 1.08$ ,  $p = 0.292$ ). B) Lesion

973 reconstruction. Darker shades indicate greater overlap between animals.

974

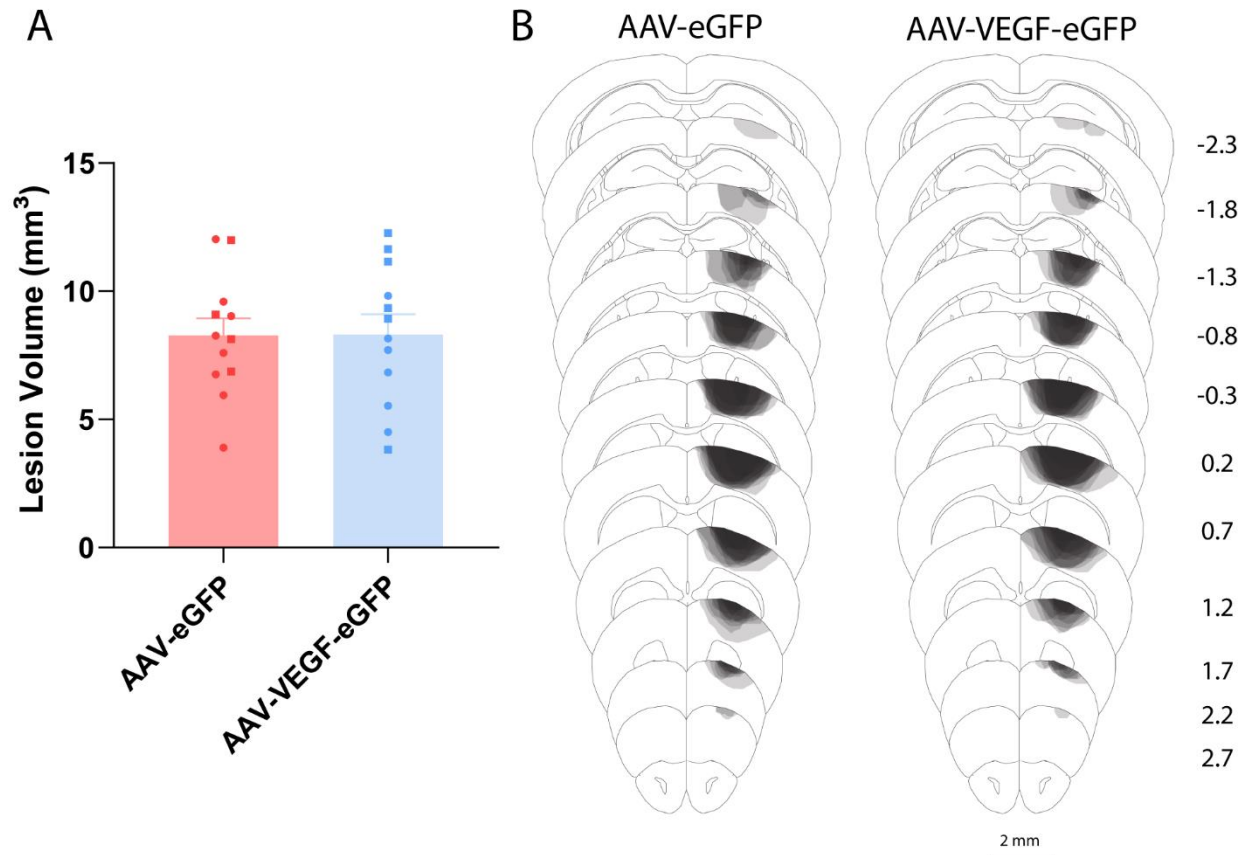

975

976 **Figure S6. AAV-VEGF-eGFP did not affect lesion size or location.**

977 A) Lesion size was not different between groups ( $t(22) = 0.04$ ,  $p = 0.967$ ). B) Lesion

978 reconstruction. Darker shades indicate greater overlap between animals.

979



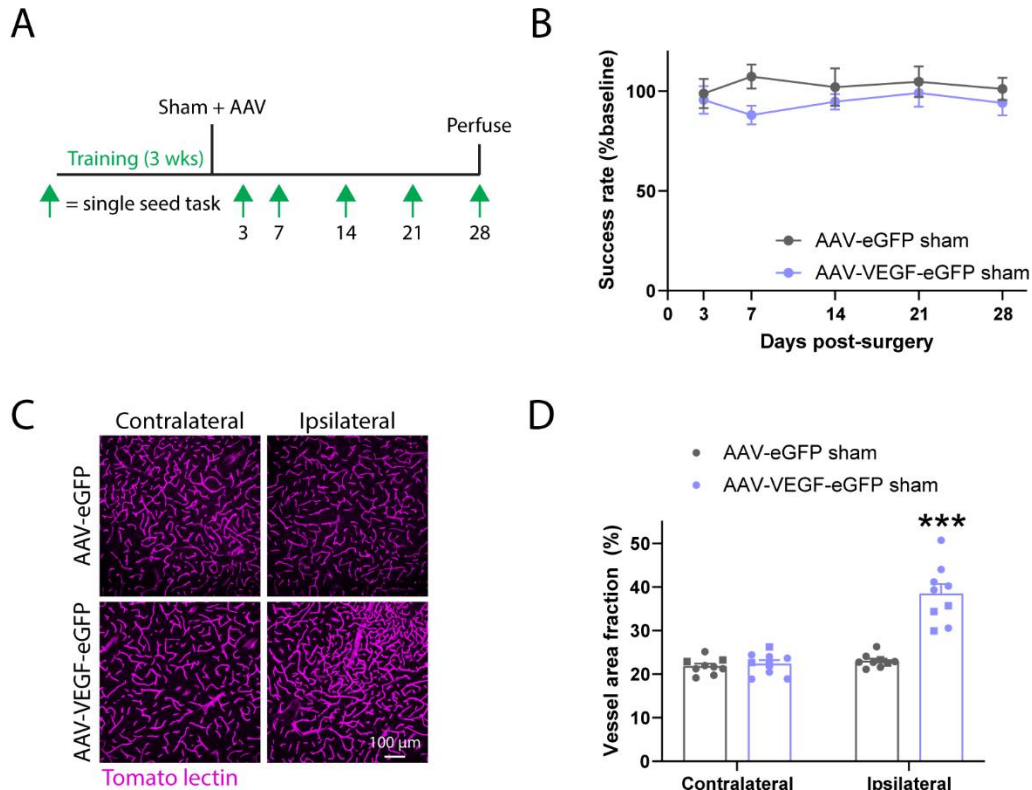

980

981 **Figure S7. AAV-VEGF-eGFP does not affect motor function in sham-operated animals.**

982 A) Experimental timeline. Wildtype mice were trained on the single seed reaching task,  
983 subjected to a sham stroke procedure, and injected with either AAV-eGFP or AAV-VEGF-eGFP  
984 ( $n = 8/\text{group}$ ). Performance on the single seed task was periodically tested up to 28 days post-  
985 surgery. B) Performance on the single seed task was not different between groups ( $F(1, 14) =$   
986  $3.8, p = 0.071$ ). C, D) Representative images (C) and quantification (D) of vasculature in  
987 contralateral and ipsilateral cortex (relative to AAV injection site). AAV-VEGF-eGFP increased  
988 vessel density in ipsilateral cortex ( $t(16) = 6.8, ***p < 0.001$ ) ( $n = 9/\text{group}$ ). Data are presented  
989 as mean  $\pm$  SEM. Where individual datapoints are shown, datapoints representing males are  
990 shown as circles; datapoints representing females are shown as squares.

991

992 **Supplemental Table 1. List of reagents.**

| <b>Antibodies</b>                                    | <b>Source</b>       | <b>Identifier</b> |
|------------------------------------------------------|---------------------|-------------------|
| Rabbit polyclonal anti-ASCL1 (1:1000)                | Abcam               | ab74065           |
| Rabbit polyclonal anti-ASCL1 (1:500)                 | Cosmo Bio           | CAC-SK-T01-003    |
| Rabbit polyclonal anti-CD133 (1:1000)                | Abcam               | ab19898           |
| Rabbit monoclonal anti-BDNF (1:1000)                 | Abcam               | ab108319          |
| Rabbit polyclonal anti-BrdU (1:500)                  | Abcam               | ab152095          |
| Rat monoclonal anti-BrdU (1:500)                     | Abcam               | ab6326            |
| Goat polyclonal anti-DCX (1:500)                     | Santa Cruz Biotech. | Sc-8066           |
| Rabbit monoclonal anti-ERG (1:500)                   | Abcam               | ab92513           |
| Rabbit polyclonal anti-FGF2 (1:500)                  | Sigma               | F-3393            |
| Rabbit polyclonal anti-GDNF (1:100)                  | Abcam               | ab18956           |
| Rabbit polyclonal anti-GFAP (1:1000)                 | Dako                | Z0334             |
| Chicken polyclonal anti-GFP (1:5000)                 | GeneTex             | GTX13970          |
| Goat polyclonal anti-HSV thymidine kinase (1:1000)   | Santa Cruz Biotech. | Sc-28038          |
| Rabbit monoclonal anti-Id2 (1:1000)                  | CalBioagents        | M213              |
| Rabbit polyclonal anti-Ki67 (1:500)                  | Abcam               | ab66155           |
| Rabbit monoclonal anti-NeuN (1:2000)                 | Millipore           | MABN140           |
| Rabbit polyclonal anti-Olig2 (1:1000)                | Millipore           | AB9610            |
| Rabbit monoclonal anti-S100 $\beta$ (1:1000)         | Abcam               | ab52642           |
| Rabbit polyclonal anti-Sox2 (1:1000)                 | Millipore           | AB5603            |
| Rabbit polyclonal anti-VEGF (1:1000)                 | Millipore           | ABS82             |
| Rabbit polyclonal anti-VEGF AF647 conjugate (1:1000) | Millipore           | ABS82-AF647       |

|                                                        |                           |             |
|--------------------------------------------------------|---------------------------|-------------|
| Rabbit polyclonal anti-VEGF (1:250)                    | Sigma                     | 07-1420     |
| Alexa Fluor 488-conjugated donkey anti-chicken (1:500) | Jackson<br>ImmunoResearch | 703-545-155 |
| Alexa Fluor 488-conjugated donkey anti-goat (1:500)    | Jackson<br>ImmunoResearch | 705-545-147 |
| Alexa Fluor 594-conjugated donkey anti-goat (1:500)    | Jackson<br>ImmunoResearch | 705-585-147 |
| Alexa Fluor 488-conjugated donkey anti-rabbit (1:500)  | Jackson<br>ImmunoResearch | 711-545-152 |
| Alexa Fluor 594-conjugated donkey anti-rabbit (1:500)  | Jackson<br>ImmunoResearch | 711-585-152 |
| Alexa Fluor 647-conjugated donkey anti-rabbit (1:500)  | Jackson<br>ImmunoResearch | 711-605-152 |
| Alexa Fluor 488-conjugated donkey anti-rat (1:500)     | Jackson<br>ImmunoResearch | 712-545-153 |
| Alexa Fluor 594-conjugated donkey anti-rat (1:500)     | Jackson<br>ImmunoResearch | 712-585-153 |

| <b>Viruses</b>                       | <b>Source</b>  | <b>Identifier</b> |
|--------------------------------------|----------------|-------------------|
| AAV5-CaMKIIa-eGFP                    | Addgene        | 50469-AAV5        |
| AAV5-EF1 $\alpha$ -eGFP              | Addgene        | 105547-AAV5       |
| AAV5-EF1 $\alpha$ -VEGFA-P2A-eGFP    | Vector Builder | N/A               |
| <b>Chemicals</b>                     | <b>Source</b>  | <b>Identifier</b> |
| Rose Bengal                          | Sigma          | Cat# 330000       |
| Bromodeoxyuridine                    | Sigma          | Cat# B5002        |
| FITC-conjugated albumin              | Sigma          | Cat# A9971        |
| Dylight 594-conjugated tomato lectin | Vector Labs    | DL-1177-1         |
| Dylight 649-conjugated tomato lectin | Vector Labs    | DL-1178-1         |

| Ganciclovir                                                      | Roche                         | N/A               |
|------------------------------------------------------------------|-------------------------------|-------------------|
| <b>Mice</b>                                                      | <b>Source</b>                 | <b>Identifier</b> |
| Ai14: B6.Cg-Gt(ROSA)26Sortm14(CAG-tdTomato)Hze/J                 | The Jackson Laboratory        | JAX #007914       |
| GFAP-TK: B6.Cg-Tg(Gfap-TK)7.1Mvs/J                               | The Jackson Laboratory        | JAX #005698       |
| Nestin-CreER: C57BL/6-Tg(Nes-cre/ERT2)KEisc/J                    | The Jackson Laboratory        | JAX #016261       |
| ASCL1-CreER: Ascl1tm1.1(Cre/ERT2)Jejo/J                          | The Jackson Laboratory        | JAX #012882       |
| CAG-LSL-Sun1-sfGFP: B6;129-Gt(ROSA)26Sortm5(CAG-Sun1/sfGFP)Nat/J | The Jackson Laboratory        | JAX #021039       |
| Thy1-GFP: Tg(Thy1-EGFP)MJrs/J                                    | The Jackson Laboratory        | JAX #007788       |
| floxed Vegfa                                                     | Genentech, Gerber et al. 1999 | N/A               |
